# Supplementary material for: Awareness and control of hypertension in Bangladesh: follow-up of a hypertensive cohort
Source: PubMed Central journal article supplement — BMJ Open. 2014 Dec 23;4(12):e004983. doi: 10.1136/bmjopen-2014-004983 (PMC4275678; doi:10.1136/bmjopen-2014-004983), 2014-12-23
Supplement: bmjopen-2014-004983.draft_revisions.pdf [file bmjopen-2014-004983.draft_revisions.pdf]

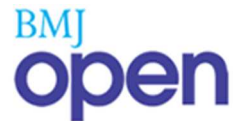

**AWARENESS AND CONTROL OF HYPERTENSION IN  
BANGLADESH—FOLLOW UP OF A HYPERTENSIVE COHORT**

|                                    |                                                                                                                                                                                                                                                                                                                                                                                                                                    |
|------------------------------------|------------------------------------------------------------------------------------------------------------------------------------------------------------------------------------------------------------------------------------------------------------------------------------------------------------------------------------------------------------------------------------------------------------------------------------|
| Journal:                           | <i>BMJ Open</i>                                                                                                                                                                                                                                                                                                                                                                                                                    |
| Manuscript ID:                     | bmjopen-2014-004983                                                                                                                                                                                                                                                                                                                                                                                                                |
| Article Type:                      | Research                                                                                                                                                                                                                                                                                                                                                                                                                           |
| Date Submitted by the Author:      | 02-Feb-2014                                                                                                                                                                                                                                                                                                                                                                                                                        |
| Complete List of Authors:          | Alam, Dewan; icddr,b, Center for Control of Chronic Diseases<br>Chowdhury, Muhammad; icddr,b, Center for Control of Chronic Diseases<br>Siddiquee, Ali; icddr,b, Center for Control of Chronic Diseases<br>Ahmed, Shyfuiddin; icddr,b, Center for Control of Chronic Diseases<br>Niessen, Louis; Liverpool School of Tropical Medicine, Health Economics;<br>Johns Hopkins Bloomberg School of Public Health, International Health |
| <b>Primary Subject<br>Heading</b>: | Public health                                                                                                                                                                                                                                                                                                                                                                                                                      |
| Secondary Subject Heading:         | Epidemiology                                                                                                                                                                                                                                                                                                                                                                                                                       |
| Keywords:                          | Hypertension < CARDIOLOGY, PUBLIC HEALTH, Quality in health care <<br>HEALTH SERVICES ADMINISTRATION & MANAGEMENT, Cardiac<br>Epidemiology < CARDIOLOGY, EPIDEMIOLOGY, PRIMARY CARE                                                                                                                                                                                                                                                |
|                                    |                                                                                                                                                                                                                                                                                                                                                                                                                                    |

SCHOLARONE™  
Manuscripts

**Title:**

AWARENESS AND CONTROL OF HYPERTENSION IN BANGLADESH – FOLLOW UP OF A  
HYPERTENSIVE COHORT

**Authors:**

Dewan Shamsul ALAM<sup>1\*</sup>, Muhammad Ashique Haider CHOWDHURY<sup>1</sup>, Ali Tanweer SIDDIQUEE<sup>1</sup>,  
Shyfuddin AHMED<sup>1</sup>, Louis Wilhelmus NIESSEN<sup>2,3</sup>

**Authors affiliations:**

<sup>1</sup>Centre for Control of Chronic Diseases (CCCD), icddr,b, 68 Shaheed Tajuddin Ahmed Sharani,  
Mohakhali, Dhaka 1212, Bangladesh

Dewan Shamsul ALAM

Acting director

Muhammad Ashique Haider CHOWDHURY

Research Investigator

Ali Tanweer SIDDIQUEE

Research Investigator

Shyfuddin AHMED

Research Investigator

<sup>2</sup>Johns Hopkins Bloomberg School of Public Health, Baltimore, MD 21205, USA

<sup>3</sup>Liverpool School of Tropical Medicine, University of Warwick, Pembroke Place, Liverpool, L3

5QA, UK

Louis Wilhelmus NIESSEN

Professor

**\*Correspondence to** Dewan Shamsul ALAM; Email: dsalam@icddr.org

## ABSTRACT

**Objectives** To assess the effect of awareness and advice to seek care on BP control among hypertensive patients in Bangladesh.

**Design** Longitudinal study

**Setting** The study was carried out in icddr,b surveillance sites at rural Matlab in Chandpur district and semi-urban Kamalapur in Dhaka, Bangladesh

**Participants** Randomly selected men and non-pregnant women aged 20 years or older without any acute illness or history of any vascular events such as stroke or acute myocardial infarction.

**Main outcome measure** Hypertension was defined as systolic BP (SBP)  $\geq 140$  and/or diastolic BP (DBP)  $\geq 90$  mmHg or as self-reported hypertension under medication. We advised to seek care from qualified provider and adopt healthy lifestyle. We compared changes in BP from baseline to follow-up at around 6 month.

**Results** Overall 17.1% (n=287) had hypertension at baseline with significantly higher prevalence in urban than rural population (23.6 % vs 10.8% ;  $p < 0.001$ ) and a half of them were unaware. At follow up, 83% (n=204) reported visit to any health care provider. In urban area, higher proportion of patients visited medically qualified practitioners than in rural area (76.7% vs 36.6% ,  $P < 0.000$ ). Both SBP ( $-3.3 \pm 20.7$  mmHg;  $p < 0.01$ ) and DBP ( $-2.0 \pm 13.0$  mmHg;  $p < 0.02$ ) were lower at follow up. Those who visited medically qualified practitioners had significant SBP ( $-3.9 \pm 22.4$  mmHg  $p < 0.03$ ) and DBP ( $-2.7 \pm 14.1$  mmHg  $p < 0.02$ ) reduction. BP reduction did not reach statistical significance among those visited pharmacy man or village doctors. Overall, half of the hypertensive patients achieved BP control goal (BP  $< 140/90$  mmHg).

**Conclusions** Raising awareness and referral advice to hypertensive patients leads to high provider visits, blood pressure reduction and higher BP target achievement in Bangladesh. Findings need a longer-term follow up to verify the sustainability.

**Key Words** – Blood pressure, hypertension, awareness, referral advice, treatment, blood pressure control, Bangladesh

### Strengths and limitations of the study

- Results based on follow-up study in low income settings overcoming some limitations of cross-sectional studies.
- Realistic estimation of effect of raising awareness on hypertension control in low-income setting.
- Blood pressure reduction as a result of regression to the mean is unlikely in this study as we took multiple measurements following standardized procedure for characterizing the baseline status as well as that at follow up.

## BACKGROUND

Hypertension is the most widely prevalent but largely preventable risk factor for cardiovascular diseases (CVD) accounting for half of deaths due to ischemic heart disease and stroke.<sup>1</sup>

Globally, 7.6 million premature deaths annually and 6.0% of the global burden of disease are attributable to hypertension.<sup>2</sup> Elevated blood pressure lower than the standard cut-off for hypertension (SBP 140 /DBP 90 mm Hg) is also associated with increased risk of myocardial infarction, stroke and CVD.<sup>3,4</sup> Hypertension is both a cause and consequence of chronic kidney diseases (CKD). A recent study showed prevalence of chronic kidney disease among 22% of undiagnosed hypertensive and 17% pre-hypertensive subjects in the United States.<sup>5</sup> Therefore, uncontrolled hypertension has huge implications for the disease burden due to CVD and CKD.

Recent report suggest 18% or 12 million 25 years or older adults in Bangladesh suffer from hypertension with higher prevalence in urban than in rural population.<sup>6</sup> Earlier reports also showed that 12-15% of 20 years or older Bangladeshi had hypertension.<sup>7-9</sup> Low awareness is common in populations in low income settings including Bangladesh.<sup>10-12</sup> Research has shown that greater awareness is associated with higher adherence to antihypertensive treatments and BP control.<sup>13</sup> Study in China<sup>14</sup> showed only 30-45% of people with hypertension were aware of their condition and only 8% had achieved target BP goals. However, data are scarce on care seeking behavior and blood pressure target achievement after raising awareness. Despite a huge disease burden attributable to hypertension and very high rate of unawareness, it is largely an unrecognized and under-researched public health problem in Bangladesh.

1  
2  
3 So far, all studies in Bangladesh reported prevalence data on hypertension, either measured  
4 and or self-reported, and awareness, treatment and control from cross-sectional studies which  
5  
6 have inherent limitations and fails to provide information on care seeking behavior and level of  
7  
8 control after being aware. In this paper we report prevalence, awareness and control of  
9  
10 hypertension at baseline and explored the effect of raising awareness coupled with health  
11  
12 messages to visit health care provider on, blood pressure and blood pressure goal achievement  
13  
14 among individuals with hypertension in urban and rural Bangladesh.  
15  
16  
17  
18  
19  
20

## 21 22 **METHODS**

### 23 24 **Study design and population**

25  
26 The longitudinal study was carried out in rural Matlab in Chandpur district and semi-urban  
27  
28 Kamalapur in Dhaka, Bangladesh. In both the sites, International Centre for Diarrhoeal Disease  
29  
30 Research, Bangladesh (icddr,b) has its Health and Demographic Surveillance System (HDSS) in  
31  
32 place.<sup>15-17</sup> Study population consisted of men and non-pregnant women aged 20 years or older  
33  
34 without any acute illness or history of any vascular events such as stroke or acute myocardial  
35  
36 infarction. We selected participants at random from the HDSS databases. We replaced  
37  
38 randomly selected individuals who were unavailable with age and sex matched participants  
39  
40 from the same community who were eligible but were not included in sample. Between  
41  
42 February and August 2011, we conducted a baseline survey and identified individuals with  
43  
44 hypertension. We informed the blood pressure status and provided simple health messages to  
45  
46 the hypertensive individuals with emphasis on visiting health care provider, possible  
47  
48 complications if untreated, and lifestyle factors. We followed up these hypertensive patients  
49  
50 and measured BP again at 4-6 month after baseline and documented history of provider visits,  
51  
52  
53  
54  
55  
56  
57  
58  
59  
60

1  
2  
3 medication use and blood pressure status. The study was approved by the Ethical Review  
4  
5  
6 Committee (ERC) of icddr,b. An informed voluntary written consent was obtained from each  
7  
8  
9 participant before enrolment.

### 10 11 **Sample Size**

12  
13  
14 We estimated sample size for each age group to measure prevalence within 10% precision with  
15  
16  
17 80% power. As the prevalence of hypertension increases with age, we assumed the lowest  
18  
19  
20 prevalence of 5% in 20-24 years age group and the highest 20% or higher in 65years or older  
21  
22  
23 age groups during stratum specific sample size estimation. The estimated total sample size after  
24  
25  
26 considering possible refusal or non-participation was 1600 participants (800 in each site).

### 27 28 **Data collection**

29  
30 We collected data on socioeconomic, demographic, lifestyle factors using a structured  
31  
32  
33 questionnaire. Trained interviewers administered the questionnaire at participants' home.  
34  
35  
36 Interviewers also measured weight, height, waist and hip circumferences following standard  
37  
38  
39 procedure<sup>18</sup>. We proscribed all participants of drinking tea, coffee, or carbonated beverages,  
40  
41  
42 eating, smoking and avoid heavy physical activity at least 30 minutes prior to blood pressure  
43  
44  
45 measurement. We allowed 10 minutes rest before measuring blood pressure three times at five  
46  
47  
48 minutes interval on left arm in sitting position with the arm supported at the level of the heart  
49  
50  
51 using Omron M10™ digital blood pressure machine. The first BP measurement was discarded  
52  
53  
54 to avoid possible anxiety effect, and the mean value of the second and third measurements was  
55  
56  
57 considered for both systolic and diastolic BP. SBP  $\geq 140$  mmHg or DBP  $\geq 90$  mmHg or both was  
58  
59  
60 defined as hypertension. Participants who were on anti-hypertensive medications and could

1  
2  
3 show or name antihypertensive medication or produce the prescription, we considered them as  
4  
5 aware and self-reported hypertensive irrespective of their BP status at the time of  
6  
7 measurement. Participants, who had high BP according to above mentioned criteria and were  
8  
9 not under any antihypertensive medication or lifestyle modification advice by any provider,  
10  
11 were considered as unaware.  
12  
13  
14

### 15 16 17 **Health advices**

18  
19 We informed all hypertensive patients about their blood pressure status and provided them  
20  
21 simple health messages in local language, Bengali. The health messages included information  
22  
23 on risk factors for hypertension, possible risk associated with uncontrolled BP, lifestyle and diet  
24  
25 related issues particularly smoking, physical activity and extra salt intake. We advised them to  
26  
27 visit a qualified health care provider. A written outline was followed to deliver the health  
28  
29 messages uniformly and adequately. However, study workers were not involved in providing  
30  
31 any prescription or medication. Adequate training including periodic refresher training of the  
32  
33 health workers and regular field visit by the supervisors were ensured to minimize intra and  
34  
35 inter individual inconsistency.  
36  
37  
38  
39  
40  
41  
42

### 43 **Follow up**

44  
45 We followed up all available hypertensive patients at around 4-6 month and collected data on  
46  
47 treatment seeking, provider visits, and medication use. A study nurse or trained Health Workers  
48  
49 measured blood pressure using the same electronic blood pressure monitor following the same  
50  
51 procedure as that in baseline. The nurse or the health worker did not have access to blood  
52  
53 pressure data collected earlier and were not aware of the purpose of the study. We considered  
54  
55  
56  
57  
58  
59  
60



1  
2  
3 blood pressure goal is achieved when mean value of second and third measurements of SBP  
4  
5 and DBP at follow up was <140 mmHg and <90 mmHg respectively.  
6  
7

### 8 9 **Data analysis**

10 Data were entered on computer with built in range and consistency check using MS Access.  
11  
12 Descriptive data are presented as frequency and percentages for the categorical variables, and  
13  
14 as mean and standard deviation for the continuous variables. Chi-square test was used to  
15  
16 examine the association between categorical variables. Paired t-test was used to compare  
17  
18 within individual change in blood pressure from baseline to follow up. A p-value <0.05 was  
19  
20 considered statistically significant.  
21  
22  
23  
24  
25  
26  
27

### 28 **RESULTS**

29  
30 In total, 1678 participants were interviewed and blood pressure measured in urban Dhaka  
31  
32 (n=825) and rural Matlab (n=853) (Figure 1). Characteristics of the study participant are  
33  
34 presented in Table 1. On average, participants were 43 years old and 44% were males. Urban  
35  
36 participants were younger, more educated, had higher BMI, more abdominal obesity, higher  
37  
38 income and of more non-manual occupation than rural participants. However, rural  
39  
40 participants used more chewing tobacco and consumed more extra salt.  
41  
42  
43  
44  
45

46 In total, 287 (17.1%) respondents were finally diagnosed as hypertensive cases (Table 1). Age  
47  
48 standardized prevalence of hypertension was 14.8% (Bangladesh standard population as  
49  
50 reported by the Bangladesh Bureau of Statistics 2008). The prevalence of hypertension was  
51  
52 significantly higher in urban than rural among participants (23.6% vs. 10.8%; p<0.001). More  
53  
54 women than men were hypertensive (18.3% vs. 15.6%). At baseline, half (49%) the total  
55  
56  
57  
58  
59  
60

1  
2  
3 hypertensive patients were aware about their BP status but only half of those who were aware  
4  
5  
6 (55%) had their BP under control (SBP<140 and DBP<90 mm Hg) (Figure 2) .  
7

8  
9  
10 At follow up, we were able to reach 245 (85%) hypertensive respondents (Figure 1). Of the 42  
11  
12 lost to follow up included 16 migrated out, 7 refused, 3 died and 16 could not be reached after  
13  
14 repeated attempts due to their day time work schedule. Among those available, 83.3%  
15  
16 reported that they visited health care provider at least once after enrolment into the study  
17  
18 (Figure 3). Over three quarters of hypertensive patients in Dhaka and a third in Matlab visited  
19  
20 professionally qualified doctors (76.7% vs 36.6%,  $P<0.000$ ) who included MBBS/MD or higher  
21  
22 qualified practitioners. The rest visited drug sellers who included pharmacy men, village doctors  
23  
24 or owner of small drug outlets with or without any diploma or certificate for medical practice.  
25  
26 This difference in choice of provider visit was significantly different between urban and rural  
27  
28 hypertensive patients. Only about a half of those (52.7%) visited care provider could show their  
29  
30 prescribed medication during the follow-up visit. About 28% of the patients did not receive any  
31  
32 written prescription from their care provider.  
33  
34  
35  
36  
37  
38  
39

40 Overall, beta-blockers were the highest prescribed antihypertensive drugs either as single or in  
41  
42 combination with calcium channel blockers followed by calcium channel blockers and  
43  
44 angiotensin receptor blockers (Figure 3). Higher use of beta-blockers was noted among those  
45  
46 seen by rural drug sellers. Diuretics were prescribed for only about 1% of the total patients.  
47  
48 About 3% patients received sedative or tranquilizer pills although mostly in addition to  
49  
50 antihypertensive medications.  
51  
52  
53  
54  
55  
56  
57  
58  
59  
60

1  
2  
3 Overall, both mean SBP ( $-3.3 \pm 20.7$  mmHg;  $p < 0.01$ ) and DBP ( $-2.0 \pm 13.0$  mmHg;  $p < 0.02$ ) were  
4 significantly lower at follow up (Figure 4). Those who visited professionally qualified providers  
5 had significantly lower SBP ( $-3.9 \pm 22.4$  mmHg  $p < 0.03$ ) and DBP ( $-2.7 \pm 14.1$  mmHg  $p < 0.02$ ) as  
6 compared to their baseline measure but those who visited drug sellers had no significant  
7 reduction in BP.  
8  
9

10  
11 Overall 50% hypertensive patients achieved BP goal at follow up. About 30% of uncontrolled  
12 hypertensives at baseline and 46% of newly diagnosed hypertensives achieved blood pressure  
13 goal at follow up. On the other hand 26% of the hypertensives who had their BP controlled at  
14 baseline failed to maintain that at follow up. BP goal achievement tended to be higher among  
15 those treated by professionally qualified practitioners than drug sellers but the difference did  
16 not reach statistical significance. At follow up, the proportion of hypertensive individuals who  
17 achieved BP goals were double as compared to those at baseline (Figure 2).  
18  
19  
20  
21  
22  
23  
24  
25  
26  
27  
28  
29  
30  
31  
32  
33  
34

## 35 DISCUSSION

### 36 *Principal findings*

37  
38 This study reports the prevalence, population awareness and subsequent control of  
39 hypertension in a general population. We demonstrated that raising awareness and simple  
40 health messages result in high provider visits and reduction in blood pressure in Bangladeshi  
41 hypertensive population. The modest reduction in blood pressure that we observed has great  
42 implications for the hypertension prevalence at population level.<sup>19</sup> To our knowledge this is the  
43 first community based longitudinal study in Bangladesh that followed up recently diagnosed  
44 hypertensive patients in day-to-day care settings in rural and urban communities.  
45  
46  
47  
48  
49  
50  
51  
52  
53  
54  
55  
56  
57  
58  
59  
60

1  
2  
3  
4  
5  
6 We found about 88% of hypertensives who were already aware at baseline and 78% of newly  
7  
8 diagnosed cases visited health care provider at least once between baseline and the follow up.  
9  
10 More urban patients than rural visited qualified health care professionals and the blood  
11  
12 pressure reduction was significantly greater in that group. On the contrary, more rural patients  
13  
14 (63.4%) visited drug sellers and the difference in blood pressure between baseline and follow  
15  
16 up was not significant. It indicates an urgent necessity for training rural drug seller on simplified  
17  
18 hypertension management guidelines for effective utilization of this important health care  
19  
20 provider group in hypertension control in Bangladesh. Extensive use of beta-blockers by both  
21  
22 types of providers has been identified as knowledge gap that need to be addressed and  
23  
24 updated urgently. This implies that the development and implementation of a simplified  
25  
26 hypertension management guideline and training of providers may ameliorate the problem.  
27  
28  
29  
30  
31  
32  
33

### 34 ***Comparison with other studies***

35  
36  
37 Community-based data on blood pressure levels in open populations are scarce in Bangladesh.  
38  
39 We found higher prevalence of hypertension in urban than rural population. Bangladesh Non-  
40  
41 communicable Diseases (NCD) risk factor survey also showed higher prevalence of hypertension  
42  
43 in urban than rural population (20% vs 16%).<sup>6</sup> The overall prevalence of hypertension in this  
44  
45 study was 17.1% and the age adjusted prevalence was 14.5% which is fairly consistent with a  
46  
47 similar studies conducted earlier.<sup>6,7</sup> However, a recent systematic review of hypertension  
48  
49 studies in Bangladesh conducted between 1994 and 2002 reported 13.5% as a pooled estimate  
50  
51 of hypertension prevalence.<sup>20</sup>  
52  
53  
54  
55  
56  
57  
58  
59  
60

1  
2  
3 Our study confirms others observation in similar settings that a high level of unawareness  
4  
5 among hypertensive patients in the community.<sup>21 22</sup> At baseline, we found only less than a half  
6  
7 of the hypertensive patients were aware of their blood pressure status and a half of those who  
8  
9 were aware had their BP under control. Similar pattern of poor detection and control of  
10  
11 hypertension has been reported previously as “the rule of halves” that is half of the  
12  
13 hypertensive patients are aware and only half of those aware are treated and half of treated  
14  
15 have their BP target achieved.<sup>23</sup> This implies that without further awareness raising campaigns  
16  
17 about three quarters of total hypertensive patients in Bangladesh will continue to live with  
18  
19 uncontrolled BP.  
20  
21  
22  
23  
24  
25

26  
27 Our longitudinal observation indicates that better BP control can be achieved through simple  
28  
29 community-based efforts to raise awareness. Similar effect of raising awareness on BP control  
30  
31 has been reported in different settings.<sup>21 24</sup> These findings need a longer-term follow up to  
32  
33 verify the sustainability.  
34  
35  
36

37  
38 Our present findings do not focus on smoking reduction which is known to increase risk of  
39  
40 acute vascular events such as myocardial infarction and stroke in hypertensive patients.<sup>25</sup>  
41  
42 Impact of high blood pressure is likely to be much higher in men in Bangladesh as 50% of them  
43  
44 are smoker as opposed to less than 2% women. Our recent report showed that 25% of all  
45  
46 deaths in Bangladeshi men aged 25 to 69 years are attributable to smoking.<sup>26</sup> This warrants  
47  
48 necessity for further intensification of anti-smoking campaigns in combination with awareness  
49  
50 raising to promote blood pressure control.  
51  
52  
53  
54  
55  
56  
57  
58  
59  
60

1  
2  
3 We found improper antihypertensive medication prescription by both qualified providers and  
4  
5 drug sellers. Beta-blockers were the single highest prescribed drugs particularly by the drug  
6  
7 sellers in rural area which may have implications for long term prognosis as treatment of  
8  
9 uncomplicated hypertension with beta-blockers has been reported to be associated with  
10  
11 increased risk of stroke without any extra benefit for cardiovascular morbidity and mortality.<sup>27</sup>  
12  
13 Major hypertension management guidelines also do not recommend beta-blockers as initial  
14  
15 treatment for hypertension.<sup>28</sup> A High beta-blocker prescription by rural informal practitioners  
16  
17 was also reported by other investigators in Bangladesh.<sup>29</sup>  
18  
19  
20  
21  
22  
23

#### 24 ***Strengths and limitations of the study***

25  
26 The major strength of our study is the population-based follow-up of hypertension control in  
27  
28 daily settings, overcoming the limitations of concurrent evaluation of hypertension control in  
29  
30 cross-sectional studies which allowed for a realistic estimation of effect of a simple campaign in  
31  
32 low-income settings.  
33  
34  
35

36  
37 One of the limitations of our study is that we did not have any control. As the study was  
38  
39 conducted in two densely populated areas, it was not possible to keep some hypertensive  
40  
41 without any advice or provide different information. Since we did not influence care seeking  
42  
43 behavior or use of medication, the effect we observed was due to high level of awareness and  
44  
45 seeking care by the hypertensive patients in the community where 50% were unaware about  
46  
47 their condition. The second issue could be whether the blood pressure reduction could  
48  
49 happen anyway as a result of regression to the mean which we believe unlikely in this study as  
50  
51 we took multiple measurements following standardized procedure for characterizing the  
52  
53  
54  
55  
56  
57  
58  
59  
60

1  
2  
3 baseline status as well as that at follow up. Our trained workers followed the same  
4  
5 measurement protocol and used the same equipment to ensure high quality measurements.  
6  
7  
8 Also, we did not study the actual rational prescribing and qualifying characteristics of the  
9  
10 involved providers. An earlier study in Bangladesh <sup>29</sup> reported in detail their findings on the  
11  
12 qualifications and level of knowledge among non-professional health care providers. They  
13  
14 found that in Bangladesh the majority of village-level providers are certified by some authority  
15  
16 and have some level of understanding of blood pressure measurement and treatment, although  
17  
18 the later could be improved. This certainly will not be the case in many other rural and urban  
19  
20 low-income settings.  
21  
22  
23  
24  
25

26  
27 Our findings suggests that simple community-based efforts to raise awareness, increase  
28  
29 diagnosing, referral advice as well as access to qualified practitioners may result in better BP  
30  
31 control in Bangladesh and similar low income settings. These findings also suggest importance  
32  
33 of developing simplified hypertension management guidelines for Bangladesh and needs for  
34  
35 appropriate training of health care providers on the guidelines for management of  
36  
37 hypertension.  
38  
39  
40  
41  
42

## 43 **CONCLUSIONS**

44  
45 The implications of our findings are potentially huge in two ways. The high level of  
46  
47 unawareness is alarming. With an estimated 12 million hypertensive patients in Bangladesh,<sup>6</sup>  
48  
49 these high levels of undiagnosed high blood pressure will have big impact on the total burden  
50  
51 of stroke and ischemic heart diseases, which are already the leading causes of adult mortality  
52  
53 and morbidity in the country.<sup>30 31</sup> Secondly, our findings of raising awareness, treatment  
54  
55  
56  
57  
58  
59  
60

1  
2  
3 seeking behavior, and blood pressure reduction in both rural and urban settings in Bangladesh  
4  
5 give cause for optimism. Drug sellers are significant health care providers particularly in rural  
6  
7 settings who can be effectively utilized for hypertension control by appropriate training on  
8  
9 simplified management guideline.  
10  
11  
12  
13  
14  
15  
16  
17  
18  
19  
20  
21  
22  
23  
24  
25  
26  
27  
28  
29  
30  
31  
32  
33  
34  
35  
36  
37  
38  
39  
40  
41  
42  
43  
44  
45  
46  
47  
48  
49  
50  
51  
52  
53  
54  
55  
56  
57  
58  
59  
60



### What is already known on this topic

- Low awareness is common among hypertensive patients and is associated with uncontrolled blood pressure and its cardiovascular and renal complications.
- Modest reduction in average blood pressure has great implications for hypertension prevalence at population level.

### What this study adds

- Results based on follow-up study in low income settings overcoming some limitations of cross-sectional studies.
- Raising awareness through community screening of BP and referral of hypertensive to health care provider appears to be practically feasible approach to control hypertension in low resource settings.
- Realistic estimation of effect of raising awareness on hypertension control in low-income setting.
- Extensive use beta-blockers in hypertension treatment justify need for the development and implementation of simplified hypertension management guidelines.
- Scope of utilizing drug sellers to control hypertension in rural settings.

**List of abbreviations**

ARB = Angiotensin receptor blockers

BB = Beta- blockers

BMI = Body Mass Index

BP = Blood pressure

CCB = Calcium channel blockers

CCCD = Centre for Control of Chronic Diseases

CKD = Chronic Kidney Diseases

CVD = Cardiovascular Diseases

DBP = Diastolic Blood Pressure

ERC = Ethical Review Committee

HDSS = Health and Demographic Surveillance System

icddr,b = International Centre for Diarrhoeal Disease Research, Bangladesh

SBP = Systolic Blood Pressure

**Contributors** Study concept, design & proposal was developed by DSA. All authors contributed equally to the analysis, interpretation and drafting of the manuscript. LWN contributed to revising and finalizing the manuscript. All authors read and approved the final manuscript. DSA is the guarantor.

**Funding** This project has been funded in part with Federal funds from the National Heart, Lung, and Blood Institute, National Institutes of Health, Department of Health and Human Services, under the Contract No. HHSN26820900032C and icddr,b (International Centre for Diarrhoeal Disease Research, Bangladesh). icddr,b acknowledges with gratitude the commitment of the Centre's donors for their generous support to its research efforts. We gratefully acknowledge the study participants and Health and Demographic Surveillance staff at Matlab and Kamalapur sites.

**Competing Interest** The authors declare that they have no competing interests.

**Ethical Approval** The study was approved by the Ethical Review Committee (ERC) of icddr,b.

**Data sharing statement** Collected data as described in the methodology are available with DSA (dsalam@icddr.org) which can be shared following icddr,b data policy (<http://www.icddr.org/who-we-are/data-policies>). A detail data set of the study will be made available for public use at the end of contract with National Heart, Lung, and Blood Institute, National Institutes of Health, Department of Health and Human Services (<https://www.nhlbighiacc.org>).

**Open Access** This is an Open Access article distributed in accordance with the Creative Commons Attribution Non Commercial (CC BY-NC 3.0) license, which permits others to distribute, remix, adapt, build upon this work noncommercially, and license their derivative works on different terms, provided the original work is properly cited and the use is non-commercial. See: <http://creativecommons.org/licenses/by-nc/3.0/>.

**REFERENCES:**

1. Kearney PM, Whelton M, Reynolds K, et al. Global burden of hypertension: analysis of worldwide data. *Lancet* 2005;**365**(9455):217-23.
2. Lawes CMM, Hoorn SV, Rodgers A. Global burden of blood-pressure-related disease, 2001. *Lancet* 2008;**371**(9623):1513-18.
3. Qureshi AI, Suri MF, Kirmani JF, et al. Is prehypertension a risk factor for cardiovascular diseases? *Stroke* 2005;**36**(9):1859-63.
4. Hsia J, Margolis KL, Eaton CB, et al. Prehypertension and cardiovascular disease risk in the Women's Health Initiative. *Circulation* 2007;**115**(7):855-60.
5. Crews DC, Plantinga LC, Miller ERI, et al. Prevalence of chronic kidney disease in persons with undiagnosed or prehypertension in the United States. *Hypertension* 2010;**55**(5):1102-9.
6. Bangladesh Society of Medicine. Bangladesh NCD Risk Factor Survey 2010. Dhaka: Director General of Health Services, 2011.
7. Sayeed MA, Banu A, Haq JA, et al. Prevalence of hypertension in Bangladesh: effect of socioeconomic risk factor on difference between rural and urban community. *Bangladesh Med Res Counc Bull* 2002;**28**(1):7-18.
8. Zaman MM, Rouf MA. Prevalence of hypertension in a Bangladeshi adult population. *J Hum Hypertens* 1999;**13**(8):547-9.
9. Zaman MM, Yoshiike N, Rouf MA, et al. Cardiovascular risk factors: distribution and prevalence in a rural population of Bangladesh. *J Cardiovasc Risk* 2001;**8**(2):103-8.
10. Damasceno A, Azevedo A, Silva-Matos C, et al. Hypertension prevalence, awareness, treatment, and control in mozambique: urban/rural gap during epidemiological transition. *Hypertension* 2009;**54**(1):77-83.
11. Devi P, Rao M, Sigamani A, et al. Prevalence, risk factors and awareness of hypertension in India: a systematic review. *J Hum Hypertens* 2012;**27**(5):281-7.
12. Hypertension Study Group. Prevalence, awareness, treatment and control of hypertension among the elderly in Bangladesh and India: a multicentre study. *Bulletin of the World Health Organization* 2001;**79**(6):490-500.
13. Hashmi SK, Afridi MB, Abbas K, et al. Factors associated with adherence to anti-hypertensive treatment in Pakistan. *PLoS One* 2007;**2**(3):e280.
14. Pang W, Li Z, Sun Z, et al. Prevalence of hypertension and associated factors among older rural adults: results from Liaoning Province, China. *Med Princ Pract* 2010;**19**(1):22-7.
15. Ginneken JV, Bairagi R, Francisco AD, et al. Health and demographic surveillance in Matlab: past, present, and future,. Dhaka: International Centre for Diarrhoeal Disease Research, Bangladesh, 1999.
16. icddr. Registration of Health and Demographic Events 2011. Health and Demographic Surveillance System - Matlab. Dhaka: International Centre for Diarrhoeal Disease Research, Bangladesh, 2012.
17. icddr. Kamalapur 2005 - 2007 Census Results. Dhaka: International Centre for Diarrhoeal Disease Research, Bangladesh, 2008.
18. Gibson R. Anthropometric assessment of body size. *Principles of Nutritional Assessment*. Second ed. New York: Oxford University Press, 2005:245-72.
19. Banegas JR, Rodriguez-Artalejo F, de la Cruz Troca JJ, et al. Blood pressure in Spain: distribution, awareness, control, and benefits of a reduction in average pressure. *Hypertension* 1998;**32**(6):998-1002.
20. Moniruzzaman, Taleb A, Rahman S, et al. Prevalence of hypertension among the Bangladeshi adult population: a meta-analysis. *Regional Health Forum* 2013;**17**(1):15-19.

21. Feng XL, Pang M, Beard J. Health system strengthening and hypertension awareness, treatment and control: data from the China Health and Retirement Longitudinal Study. *Bulletin of the World Health Organization* 2014;**92**(1):29-41.
22. Guessous I, Bochud M, Theler JM, et al. 1999-2009 Trends in prevalence, unawareness, treatment and control of hypertension in Geneva, Switzerland. *PLoS One* 2012;**7**(6):e39877.
23. Smith WC, Lee AJ, Crombie IK, et al. Control of blood pressure in Scotland: the rule of halves. *BMJ* 1990;**300**(6730):981-3.
24. Ambrosio GB, Strasser T, Dowd JE, et al. Effects of interventions on community awareness and treatment of hypertension: results of a WHO study. *Bull World Health Organ* 1988;**66**(1):107-13.
25. Nakamura K, Barzi F, Lam TH, et al. Cigarette smoking, systolic blood pressure, and cardiovascular diseases in the Asia-Pacific region. *Stroke* 2008;**39**(6):1694-702.
26. Alam DS, Jha P, Ramasundarahettige C, et al. Smoking-attributable mortality in Bangladesh: proportional mortality study. *Bull World Health Organ* 2013;**91**(10):757-64.
27. Bangalore S, Parkar S, Messerli FH. How useful are beta-blockers in cardiovascular disease? *Anadolu kardiyoloji dergisi: AKD= the Anatolian journal of cardiology* 2006;**6**(4):358-63.
28. National Clinical Guideline Centre (NCGC). Hypertension: clinical management of primary hypertension in adults (Clinical guideline 127: Update of clinical guidelines 18 and 34). London: National Clinical Guideline Centre, 2011.
29. Parr J, Lindeboom W, Khanam M, et al. Informal allopathic provider knowledge and practice regarding hypertension in urban and rural Bangladesh. *PLoS One* 2012;**7**(10):e48056.
30. Miah AH, Sutradhar SR, Ahmed S, et al. Seasonal variation in types of stroke and its common risk factors. *Mymensingh Med J* 2012;**21**(1):13-20.
31. Uddin SN, Begum F, Malik F, et al. Coronary artery disease in young patients: clinical review and risk factor analysis. *Mymensingh Med J* 2003;**12**(1):3-7.

## TABLE

Table 1: Characteristics of the respondents

|                                                | Total<br>n=1678 | Dhaka<br>n=825 | Matlab<br>n=853 | P Value |
|------------------------------------------------|-----------------|----------------|-----------------|---------|
| <b>Age (years)</b>                             | 43.5 ± 15.1     | 40.7 ± 14.8    | 46.1 ± 15.0     | 0.000   |
| <b>Male</b>                                    | 736 (43.9)      | 352 (42.7)     | 384 (45.0)      | 0.332   |
| <b>Education in year</b>                       | 5.1 ± 4.7       | 6.2 ± 5.1      | 4.0 ± 4.0       | 0.000   |
| <b>Educational category</b>                    |                 |                |                 | 0.000   |
| Illiterate                                     | 582 (34.7)      | 245 (29.7)     | 337 (39.5)      |         |
| Primary (1-5 years)                            | 377 (22.5)      | 145 (17.6)     | 232 (27.2)      |         |
| Secondary (6-10 years)                         | 521 (31.0)      | 282 (34.2)     | 239 (28.0)      |         |
| High educated (>11 years)                      | 198 (11.8)      | 153 (18.5)     | 45 (5.3)        |         |
| <b>Occupation</b>                              |                 |                |                 | 0.000   |
| Manual                                         | 368 (21.9)      | 124 (15.0)     | 244 (28.6)      |         |
| Non-Manual*                                    | 1310 (78.1)     | 701 (85.0)     | 609 (71.4)      |         |
| <b>Income '000 Taka†</b>                       | 15.5 ± 13.5     | 19.5 ± 15.5    | 11.6 ± 9.9      | 0.000   |
| <b>Income Group</b>                            |                 |                |                 | 0.000   |
| Low (<=10000tk)                                | 846 (50.4)      | 256 (31.0)     | 590 (69.2)      |         |
| Middle (10001-30000tk)                         | 710 (42.3)      | 478 (57.9)     | 232 (27.2)      |         |
| High (>=30001)                                 | 122 (7.3)       | 91 (11.0)      | 31 (3.6)        |         |
| <b>Body Mass Index in kg/m<sup>2</sup></b>     | 22.6 ± 7.0      | 24.2 ± 5.1     | 21.0 ± 8.1      | 0.000   |
| <b>BMI Category</b>                            |                 |                |                 | 0.000   |
| Underweight (<18.5 kg/m <sup>2</sup> )         | 341 (20.3)      | 92 (11.2)      | 249 (29.2)      |         |
| Overweight/Obese(>=25 kg/m <sup>2</sup> )      | 424 (25.3)      | 328 (39.8)     | 96 (11.3)       |         |
| <b>Waist Circumference in cm</b>               | 77.4 ± 11.7     | 81.0 ± 12.2    | 73.9 ± 10.1     | 0.000   |
| Abdominal obesity                              | 466 (27.8)      | 317 (38.4)     | 149 (17.5)      | 0.000   |
| <b>Extra Salt Intake (At least once a day)</b> | 1345 (80.4)     | 564 (68.5)     | 781 (91.9)      | 0.000   |
| <b>Tobacco use</b>                             |                 |                |                 |         |
| Smokers                                        | 500 (29.8)      | 234 (28.4)     | 266 (31.2)      | 0.207   |
| Chewing Tobacco                                | 536 (31.9)      | 203 (24.6)     | 333 (39.0)      | 0.000   |
| <b>Systolic BP</b>                             | 113.1 ± 18.7    | 117.3 ± 18.9   | 109.1 ± 17.6    | 0.000   |
| <b>Diastolic BP</b>                            | 71.6 ± 15.7     | 72.5 ± 19.4    | 70.7 ± 10.8     | 0.021   |
| <b>Blood Pressure Category</b>                 |                 |                |                 | 0.000   |
| Normal                                         | 1053 (62.8)     | 423 (51.3)     | 630 (73.9)      |         |
| Pre-hypertension                               | 338 (20.1)      | 207 (25.1)     | 131 (15.4)      |         |
| Hypertension                                   | 287 (17.1)      | 195 (23.6)     | 92(10.8)        |         |

Mean ± SD

Numbers in the parenthesis are percentages.

\*Non-manual category included sedentary workers, professionals (e.g. doctors, teachers, etc.), housewives, retired persons, those unable to work and unemployed.

†Bangladesh currency Taka 80.00 = USD 1.00

‡Abdominal obesity was defined as waist circumference ≥90 cm for males and ≥80 cm for females

‡Extra salt intake was referred to table salt consumption at least once a day other than salt used in cooking or food preparation.

## FIGURE LEGENDS

**Figure 1.** Study enrolment and follow up flow diagram

**Figure 2.** Distribution of awareness and control of blood pressure among hypertensive patients at baseline and at follow up by gender in Bangladesh

**Figure 3.** Pattern of health care provider visits and medication use in urban Dhaka and rural Matlab, Bangladesh.

Panel A. Distribution of provider visits by area. Panel B. Pattern of medication use by hypertensive patients.

\*Professionals included MBBS/MD or higher educated health care providers. Drug sellers included pharmacy men, village doctors or owner of small drug outlets with or without any diploma or certificate for medical practice.

BB – Beta- blockers, CCB – Calcium channel blockers, ARB – Angiotensin receptor blockers

**Figure 4.** Change in systolic and diastolic blood pressure between baseline and follow-up by provider type.

\* Professionals included MBBS/MD or higher educated health care providers. Drug sellers included pharmacy men, village doctors or owner of small drug outlets with or without any diploma or certificate for medical practice.

Figure 1.

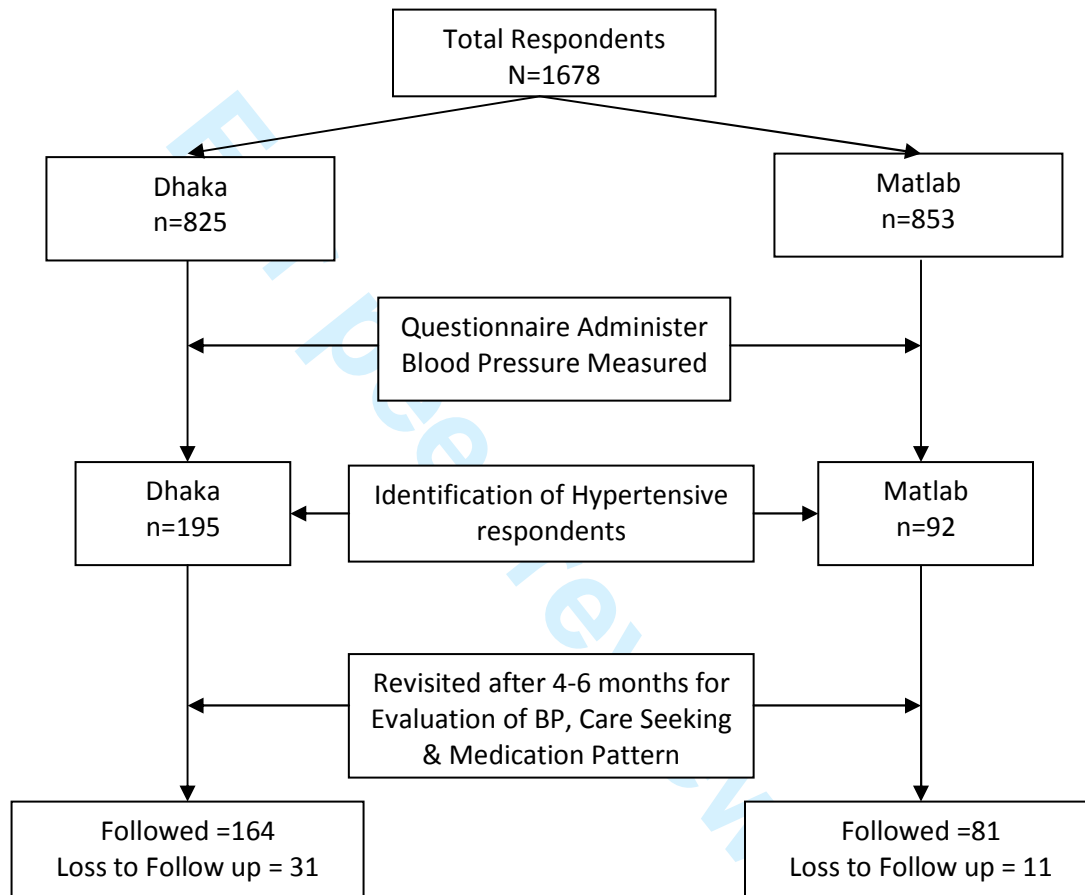



Figure 2.

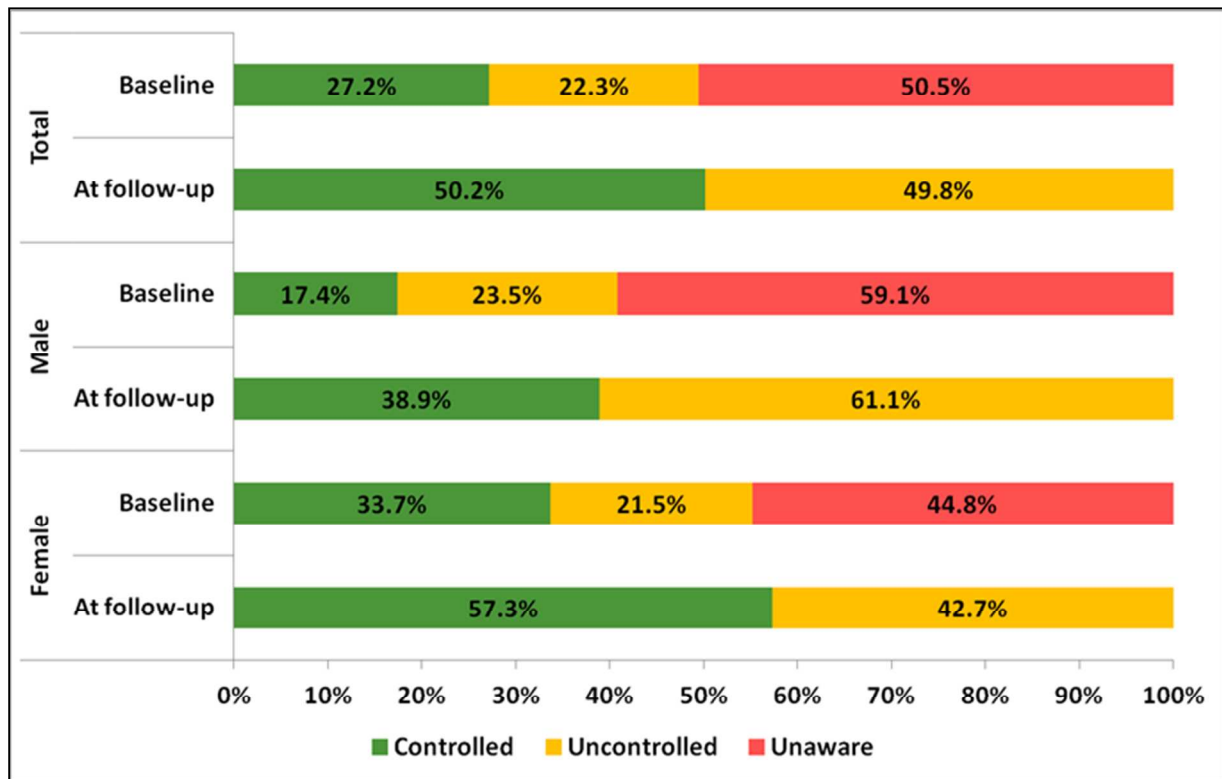

Figure 3.

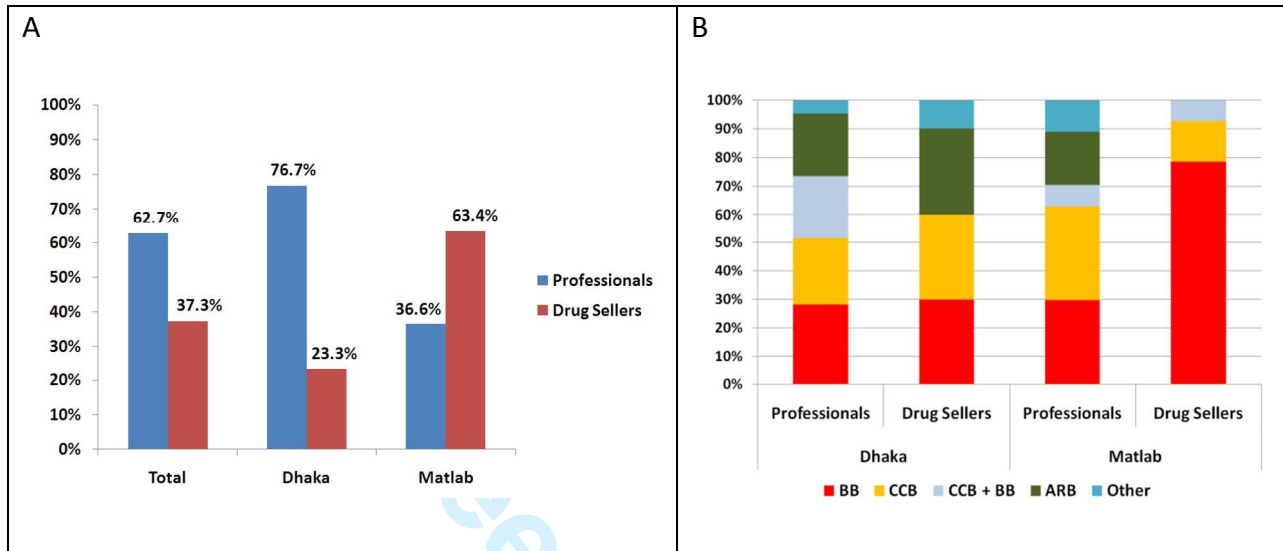

For peer review only

Figure 4.

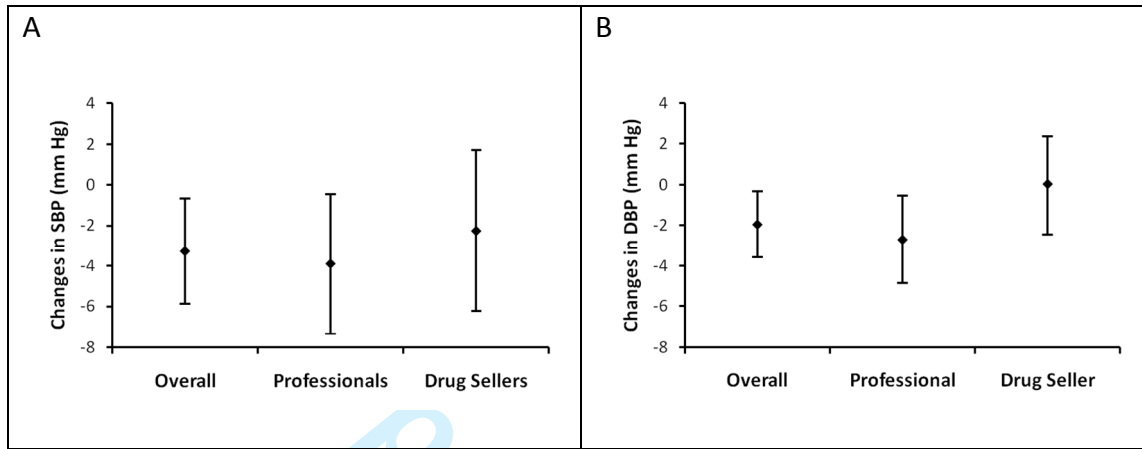

## STROBE Statement—checklist of items that should be included in reports of observational studies

|                              | Item No | Page No. | Recommendation                                                                                                                                                                                                                                                                                                                                                                                                                                                                                                                                                                                                                                                                                   |
|------------------------------|---------|----------|--------------------------------------------------------------------------------------------------------------------------------------------------------------------------------------------------------------------------------------------------------------------------------------------------------------------------------------------------------------------------------------------------------------------------------------------------------------------------------------------------------------------------------------------------------------------------------------------------------------------------------------------------------------------------------------------------|
| <b>Title and abstract</b>    | √1      | 1, 2     | (a) Indicate the study's design with a commonly used term in the title or the abstract<br>(b) Provide in the abstract an informative and balanced summary of what was done and what was found                                                                                                                                                                                                                                                                                                                                                                                                                                                                                                    |
| <b>Introduction</b>          |         |          |                                                                                                                                                                                                                                                                                                                                                                                                                                                                                                                                                                                                                                                                                                  |
| Background/<br>rationale     | √2      | 4        | Explain the scientific background and rationale for the investigation being reported                                                                                                                                                                                                                                                                                                                                                                                                                                                                                                                                                                                                             |
| Objectives                   | √3      | 5        | State specific objectives, including any prespecified hypotheses                                                                                                                                                                                                                                                                                                                                                                                                                                                                                                                                                                                                                                 |
| <b>Methods</b>               |         |          |                                                                                                                                                                                                                                                                                                                                                                                                                                                                                                                                                                                                                                                                                                  |
| Study design                 | √4      | 5        | Present key elements of study design early in the paper                                                                                                                                                                                                                                                                                                                                                                                                                                                                                                                                                                                                                                          |
| Setting                      | √5      | 5        | Describe the setting, locations, and relevant dates, including periods of recruitment, exposure, follow-up, and data collection                                                                                                                                                                                                                                                                                                                                                                                                                                                                                                                                                                  |
| Participants                 | √6      | 5        | (a) <i>Cohort study</i> —Give the eligibility criteria, and the sources and methods of selection of participants. Describe methods of follow-up<br><i>Case-control study</i> —Give the eligibility criteria, and the sources and methods of case ascertainment and control selection. Give the rationale for the choice of cases and controls<br><i>Cross-sectional study</i> —Give the eligibility criteria, and the sources and methods of selection of participants<br>(b) <i>Cohort study</i> —For matched studies, give matching criteria and number of exposed and unexposed<br><i>Case-control study</i> —For matched studies, give matching criteria and the number of controls per case |
| Variables                    | √7      | 6        | Clearly define all outcomes, exposures, predictors, potential confounders, and effect modifiers. Give diagnostic criteria, if applicable                                                                                                                                                                                                                                                                                                                                                                                                                                                                                                                                                         |
| Data sources/<br>measurement | √8*     | 6        | For each variable of interest, give sources of data and details of methods of assessment (measurement). Describe comparability of assessment methods if there is more than one group                                                                                                                                                                                                                                                                                                                                                                                                                                                                                                             |
| Bias                         | √9      | 5, 6,7   | Describe any efforts to address potential sources of bias                                                                                                                                                                                                                                                                                                                                                                                                                                                                                                                                                                                                                                        |
| Study size                   | √10     | 6        | Explain how the study size was arrived at                                                                                                                                                                                                                                                                                                                                                                                                                                                                                                                                                                                                                                                        |
| Quantitative<br>variables    | √11     | 8        | Explain how quantitative variables were handled in the analyses. If applicable, describe which groupings were chosen and why                                                                                                                                                                                                                                                                                                                                                                                                                                                                                                                                                                     |
| Statistical methods          | √12     | 8        | (a) Describe all statistical methods, including those used to control for confounding<br>(b) Describe any methods used to examine subgroups and interactions<br>(c) Explain how missing data were addressed<br>(d) <i>Cohort study</i> —If applicable, explain how loss to follow-up was addressed<br><i>Case-control study</i> —If applicable, explain how matching of cases and controls was addressed<br><i>Cross-sectional study</i> —If applicable, describe analytical methods taking account of sampling strategy<br>(e) Describe any sensitivity analyses                                                                                                                                |

Continued on next page

| <b>Results</b>           |      |       |                                                                                                                                                                                                              |
|--------------------------|------|-------|--------------------------------------------------------------------------------------------------------------------------------------------------------------------------------------------------------------|
| Participants             | √13* | 8     | (a) Report numbers of individuals at each stage of study—eg numbers potentially eligible, examined for eligibility, confirmed eligible, included in the study, completing follow-up, and analysed            |
|                          |      | 9     | (b) Give reasons for non-participation at each stage                                                                                                                                                         |
|                          |      | 24    | (c) Consider use of a flow diagram                                                                                                                                                                           |
| Descriptive data         | √14* | 8     | (a) Give characteristics of study participants (eg demographic, clinical, social) and information on exposures and potential confounders                                                                     |
|                          |      | 9     | (b) Indicate number of participants with missing data for each variable of interest                                                                                                                          |
|                          |      |       | (c) <i>Cohort study</i> —Summarise follow-up time (eg, average and total amount)                                                                                                                             |
| Outcome data             | √15* | 8, 10 | <i>Cohort study</i> —Report numbers of outcome events or summary measures over time                                                                                                                          |
|                          |      |       | <i>Case-control study</i> —Report numbers in each exposure category, or summary measures of exposure                                                                                                         |
|                          |      |       | <i>Cross-sectional study</i> —Report numbers of outcome events or summary measures                                                                                                                           |
| Main results             | √16  | 8     | (a) Give unadjusted estimates and, if applicable, confounder-adjusted estimates and their precision (eg, 95% confidence interval). Make clear which confounders were adjusted for and why they were included |
|                          |      | 8     | (b) Report category boundaries when continuous variables were categorized                                                                                                                                    |
|                          |      |       | (c) If relevant, consider translating estimates of relative risk into absolute risk for a meaningful time period                                                                                             |
| Other analyses           | 17   |       | Report other analyses done—eg analyses of subgroups and interactions, and sensitivity analyses                                                                                                               |
| <b>Discussion</b>        |      |       |                                                                                                                                                                                                              |
| Key results              | √18  | 10    | Summarise key results with reference to study objectives                                                                                                                                                     |
| Limitations              | √19  | 13    | Discuss limitations of the study, taking into account sources of potential bias or imprecision. Discuss both direction and magnitude of any potential bias                                                   |
| Interpretation           | √20  | 11    | Give a cautious overall interpretation of results considering objectives, limitations, multiplicity of analyses, results from similar studies, and other relevant evidence                                   |
| Generalisability         | √21  | 14    | Discuss the generalisability (external validity) of the study results                                                                                                                                        |
| <b>Other information</b> |      |       |                                                                                                                                                                                                              |
| Funding                  | √22  | 18    | Give the source of funding and the role of the funders for the present study and, if applicable, for the original study on which the present article is based                                                |

\*Give information separately for cases and controls in case-control studies and, if applicable, for exposed and unexposed groups in cohort and cross-sectional studies.

**Note:** An Explanation and Elaboration article discusses each checklist item and gives methodological background and published examples of transparent reporting. The STROBE checklist is best used in conjunction with this article (freely available on the Web sites of PLoS Medicine at <http://www.plosmedicine.org/>, Annals of Internal Medicine at <http://www.annals.org/>, and Epidemiology at <http://www.epidem.com/>). Information on the STROBE Initiative is available at [www.strobe-statement.org](http://www.strobe-statement.org).

# Please wait...

If this message is not eventually replaced by the proper contents of the document, your PDF viewer may not be able to display this type of document.

You can upgrade to the latest version of Adobe Reader for Windows®, Mac, or Linux® by visiting <http://www.adobe.com/products/acrobat/readstep2.html>.

For more assistance with Adobe Reader visit <http://www.adobe.com/support/products/acrreader.html>.

Windows is either a registered trademark or a trademark of Microsoft Corporation in the United States and/or other countries. Mac is a trademark of Apple Inc., registered in the United States and other countries. Linux is the registered trademark of Linus Torvalds in the U.S. and other countries.

# BMJ Open

## AWARENESS AND CONTROL OF HYPERTENSION IN BANGLADESH—FOLLOW UP OF A HYPERTENSIVE COHORT

|                                 |                                                                                                                                                                                                                                                                                                                                                                                                                                    |
|---------------------------------|------------------------------------------------------------------------------------------------------------------------------------------------------------------------------------------------------------------------------------------------------------------------------------------------------------------------------------------------------------------------------------------------------------------------------------|
| Journal:                        | <i>BMJ Open</i>                                                                                                                                                                                                                                                                                                                                                                                                                    |
| Manuscript ID:                  | bmjopen-2014-004983.R1                                                                                                                                                                                                                                                                                                                                                                                                             |
| Article Type:                   | Research                                                                                                                                                                                                                                                                                                                                                                                                                           |
| Date Submitted by the Author:   | 19-Aug-2014                                                                                                                                                                                                                                                                                                                                                                                                                        |
| Complete List of Authors:       | Alam, Dewan; icddr,b, Center for Control of Chronic Diseases<br>Chowdhury, Muhammad; icddr,b, Center for Control of Chronic Diseases<br>Siddiquee, Ali; icddr,b, Center for Control of Chronic Diseases<br>Ahmed, Shyfuiddin; icddr,b, Center for Control of Chronic Diseases<br>Niessen, Louis; Liverpool School of Tropical Medicine, Health Economics;<br>Johns Hopkins Bloomberg School of Public Health, International Health |
| <b>Primary Subject Heading</b>: | Public health                                                                                                                                                                                                                                                                                                                                                                                                                      |
| Secondary Subject Heading:      | Epidemiology                                                                                                                                                                                                                                                                                                                                                                                                                       |
| Keywords:                       | Hypertension < CARDIOLOGY, PUBLIC HEALTH, Quality in health care < HEALTH SERVICES ADMINISTRATION & MANAGEMENT, Cardiac<br>Epidemiology < CARDIOLOGY, EPIDEMIOLOGY, PRIMARY CARE                                                                                                                                                                                                                                                   |
|                                 |                                                                                                                                                                                                                                                                                                                                                                                                                                    |

SCHOLARONE™  
Manuscripts

**Title:**

AWARENESS AND CONTROL OF HYPERTENSION IN BANGLADESH – FOLLOW UP OF A  
HYPERTENSIVE COHORT

**Authors:**

Dewan Shamsul ALAM<sup>1\*</sup>, Muhammad Ashique Haider CHOWDHURY<sup>1</sup>, Ali Tanweer SIDDIQUEE<sup>1</sup>,  
Shyfuiddin AHMED<sup>1</sup>, Louis Wilhelmus NIESSEN<sup>2,3</sup>

**Authors affiliations:**

<sup>1</sup>Centre for Control of Chronic Diseases (CCCD), icddr,b, 68 Shaheed Tajuddin Ahmed Sharani,  
Mohakhali, Dhaka 1212, Bangladesh

Dewan Shamsul ALAM

Acting director

Muhammad Ashique Haider CHOWDHURY

Senior Research Investigator

Ali Tanweer SIDDIQUEE

Senior Research Investigator

Shyfuiddin AHMED

Research Investigator

<sup>2</sup>Johns Hopkins Bloomberg School of Public Health, Baltimore, MD 21205, USA

<sup>3</sup>Liverpool School of Tropical Medicine, University of Warwick, Pembroke Place, Liverpool, L3

5QA, UK

Louis Wilhelmus NIESSEN

Professor

**\*Correspondence to** Dewan Shamsul ALAM; Email: dsalam@icddr.org

**Key Words** – Blood pressure, hypertension, awareness, referral advice, treatment, blood  
pressure control, Bangladesh



## ABSTRACT

**Objectives** To assess the effect of awareness and advice to seek care on BP control among hypertensive patients in Bangladesh.

**Design** Longitudinal study

**Setting** The study was carried out in icddr,b surveillance sites at rural Matlab in Chandpur district and semi-urban Kamalapur in Dhaka, Bangladesh

**Participants** Randomly selected men and non-pregnant women aged 20 years or older without any acute illness or history of any vascular events such as stroke or acute myocardial infarction.

**Main outcome measure** Hypertension was defined as systolic BP (SBP)  $\geq 140$  and/or diastolic BP (DBP)  $\geq 90$  mmHg or as self-reported hypertension under medication. We advised to seek care from qualified provider and adopt healthy lifestyle. We compared changes in BP from baseline to follow-up at around 6 month.

**Results** Overall 17.1% (n=287) had hypertension at baseline with significantly higher prevalence in urban than rural population (23.6 % vs 10.8% ;  $p < 0.001$ ) and a half of them were unaware. At follow up, 83% (n=204) reported visit to any health care provider. In urban area, higher proportion of patients visited medically qualified practitioners than in rural area (76.7% vs 36.6% ,  $P < 0.000$ ). Both SBP ( $-3.3 \pm 20.7$  mmHg;  $p < 0.01$ ) and DBP ( $-2.0 \pm 13.0$  mmHg;  $p < 0.02$ ) were lower at follow up. Those who visited medically qualified practitioners had significant SBP ( $-3.9 \pm 22.4$  mmHg  $p < 0.03$ ) and DBP ( $-2.7 \pm 14.1$  mmHg  $p < 0.02$ ) reduction. BP reduction did not reach statistical significance among those visited pharmacy man or village doctors. Overall, half of the hypertensive patients achieved BP control goal (BP  $< 140/90$  mmHg).

**Conclusions** Awareness and simple health messages increase provider visit, reduce blood pressure and improve BP control in hypertensive Bangladeshis. Longer-term follow up is required to verify the sustainability.

### Strengths and limitations of the study

- Results based on follow-up study in low income settings overcoming some limitations of cross-sectional studies.
- Realistic estimation of effect of raising awareness on hypertension control in low-income setting.
- Blood pressure reduction as a result of regression to the mean is unlikely in this study as we took multiple measurements following standardized procedure for characterizing the baseline status as well as that at follow up.

## BACKGROUND

Hypertension is the most widely prevalent but largely preventable risk factor for cardiovascular diseases (CVD) accounting for half of deaths due to ischemic heart disease and stroke.<sup>1</sup>

Globally, 7.6 million premature deaths annually and 6.0% of the global burden of disease are attributable to hypertension.<sup>2</sup> Elevated blood pressure lower than the standard cut-off for hypertension (SBP 140 /DBP 90 mm Hg) is also associated with increased risk of myocardial infarction, stroke and CVD.<sup>3,4</sup> Hypertension is both a cause and consequence of chronic kidney diseases (CKD). A recent study showed prevalence of chronic kidney disease among 22% of undiagnosed hypertensive and 17% pre-hypertensive subjects in the United States.<sup>5</sup> Therefore, uncontrolled hypertension has huge implications for the disease burden due to CVD and CKD.

Recent report suggest 18% or 12 million 25 years or older adults in Bangladesh suffer from hypertension with higher prevalence in urban than in rural population.<sup>6</sup> Earlier reports also showed that 12-15% of 20 years or older Bangladeshi had hypertension.<sup>7-9</sup> Low awareness is common in populations in low income settings including Bangladesh.<sup>10-12</sup> Research has shown that greater awareness is associated with higher adherence to antihypertensive treatments and BP control.<sup>13</sup> Study in China<sup>14</sup> showed only 30-45% of people with hypertension were aware of their condition and only 8% had achieved target BP goals. However, data are scarce on care seeking behavior and blood pressure target achievement after raising awareness. Despite a huge disease burden attributable to hypertension and very high rate of unawareness, it is largely an unrecognized and under-researched public health problem in Bangladesh.

1  
2  
3 So far, all studies in Bangladesh reported prevalence data on hypertension, either measured  
4  
5 and or self-reported, and awareness, treatment and control from cross-sectional studies which  
6  
7 have inherent limitations and fails to provide information on care seeking behavior and level of  
8  
9 control after being aware. In this paper we report prevalence, awareness and control of  
10  
11 hypertension at baseline and explored the effect of raising awareness coupled with health  
12  
13 messages to visit health care provider on, blood pressure and blood pressure goal achievement  
14  
15 among individuals with hypertension in urban and rural Bangladesh.  
16  
17  
18  
19  
20

## 21 22 **METHODS**

### 23 24 **Study design and population**

25  
26 The longitudinal study was carried out in rural Matlab in Chandpur district and semi-urban  
27  
28 Kamalapur in Dhaka, Bangladesh. In both the sites, International Centre for Diarrhoeal Disease  
29  
30 Research, Bangladesh (icddr,b) has its Health and Demographic Surveillance System (HDSS) in  
31  
32 place.<sup>15-17</sup> Study population consisted of men and non-pregnant women aged 20 years or older  
33  
34 without any acute illness or history of any vascular events such as stroke or acute myocardial  
35  
36 infarction. We selected participants at random from the HDSS databases. We replaced  
37  
38 randomly selected individuals who were unavailable (17% in semiurban Kamalapur and 15% in  
39  
40 rural Matlab) with age and sex matched participants from the same community who were  
41  
42 eligible but were not included in sample. Between February and August 2011, we conducted a  
43  
44 baseline survey and identified individuals with hypertension. Very few participants declined to  
45  
46 participate (3.9% in Kamalapur and none in Matlab). We informed the blood pressure status  
47  
48 and provided simple health messages to the hypertensive individuals with emphasis on visiting  
49  
50 health care provider, possible complications if untreated, and lifestyle factors. We followed up  
51  
52  
53  
54  
55  
56  
57  
58  
59  
60

1  
2  
3 these hypertensive patients and measured BP again at 4-6 month after baseline and  
4  
5  
6 documented history of provider visits, medication use and blood pressure status. The study was  
7  
8  
9 approved by the Ethical Review Committee (ERC) of icddr,b. An informed voluntary written  
10  
11 consent was obtained from each participant before enrolment.  
12

### 13 14 **Sample Size**

15  
16 We estimated sample size for each age group to measure prevalence within 10% precision with  
17  
18 80% power. As the prevalence of hypertension increases with age, we assumed the lowest  
19  
20 prevalence of 5% in 20-24 years age group and the highest 20% or higher in 65years or older  
21  
22 age groups during stratum specific sample size estimation. The estimated total sample size after  
23  
24 considering possible refusal or non-participation was 1600 participants (800 in each site).  
25  
26  
27  
28  
29

### 30 31 **Data collection**

32  
33 We collected data on socioeconomic, demographic, lifestyle factors using a structured  
34  
35 questionnaire. Trained interviewers administered the questionnaire at participants' home.  
36  
37 Interviewers also measured weight, height, waist and hip circumferences following standard  
38  
39 procedure<sup>18</sup>. We proscribed all participants of drinking tea, coffee, or carbonated beverages,  
40  
41 eating, smoking and avoid heavy physical activity at least 30 minutes prior to blood pressure  
42  
43 measurement. We allowed 10 minutes rest before measuring blood pressure three times at five  
44  
45 minutes interval on left arm in sitting position with the arm supported at the level of the heart  
46  
47 using Omron M10™ digital blood pressure machine. The first BP measurement was discarded  
48  
49 to avoid possible anxiety effect, and the mean value of the second and third measurements was  
50  
51 considered for both systolic and diastolic BP. SBP  $\geq 140$  mmHg or DBP  $\geq 90$  mmHg or both was  
52  
53  
54  
55  
56  
57  
58  
59  
60

1  
2  
3 defined as hypertension. Participants who were on anti-hypertensive medications and could  
4  
5 show or name antihypertensive medication or produce the prescription, we considered them as  
6  
7 aware and self-reported hypertensive irrespective of their BP status at the time of  
8  
9 measurement. Participants, who had high BP according to above mentioned criteria and were  
10  
11 not under any antihypertensive medication or lifestyle modification advice by any provider,  
12  
13 were considered as unaware.  
14  
15  
16  
17

### 18 19 **Health advices**

20  
21 We informed all hypertensive patients about their blood pressure status and provided them  
22  
23 simple health messages in local language, Bengali. The health messages included information  
24  
25 on risk factors for hypertension, possible risk associated with uncontrolled BP, lifestyle and diet  
26  
27 related issues particularly smoking, physical activity and extra salt intake. We advised them to  
28  
29 visit a qualified health care provider. A written outline was followed to deliver the health  
30  
31 messages uniformly and adequately. However, study workers were not involved in providing  
32  
33 any prescription or medication. Adequate training including periodic refresher training of the  
34  
35 health workers and regular field visit by the supervisors were ensured to minimize intra and  
36  
37 inter individual inconsistency.  
38  
39  
40  
41  
42  
43  
44

### 45 46 **Follow up**

47  
48 We followed up all available hypertensive patients at around 4-6 month and collected data on  
49  
50 treatment seeking, provider visits, and medication use. A study nurse or trained Health Workers  
51  
52 measured blood pressure using the same electronic blood pressure monitor following the same  
53  
54 procedure as that in baseline. The nurse or the health worker did not have access to blood  
55  
56  
57  
58  
59  
60

1  
2  
3 pressure data collected earlier and were not aware of the purpose of the study. We considered  
4  
5 blood pressure goal is achieved when mean value of second and third measurements of SBP  
6  
7 and DBP at follow up was <140 mmHg and <90 mmHg respectively.  
8  
9

### 10 11 **Data analysis**

12  
13 Data were entered on computer with built in range and consistency check using MS Access.  
14  
15 Descriptive data are presented as frequency and percentages for the categorical variables, and  
16  
17 as mean and standard deviation for the continuous variables. Chi-square test was used to  
18  
19 examine the association between categorical variables. Paired t-test was used to compare  
20  
21 within individual change in blood pressure from baseline to follow up. A p-value <0.05 was  
22  
23 considered statistically significant.  
24  
25  
26  
27  
28  
29

### 30 31 **RESULTS**

32  
33 In total, 1678 participants were interviewed and blood pressure measured in urban Dhaka  
34  
35 (n=825) and rural Matlab (n=853) (Figure 1). Characteristics of the study participant are  
36  
37 presented in Table 1. On average, participants were 43 years old and 44% were males. Urban  
38  
39 participants were younger, more educated, had higher BMI, more abdominal obesity, higher  
40  
41 income and of more non-manual occupation than rural participants. However, rural  
42  
43 participants used more chewing tobacco and consumed more extra salt.  
44  
45  
46  
47  
48

49  
50 In total, 287 (17.1%) respondents were finally diagnosed as hypertensive cases (Controlled-  
51  
52 4.6%; Stage 1- 8.2% and Stage 2- 4.3%). Age standardized prevalence of hypertension was  
53  
54 14.8% (Bangladesh standard population as reported by the Bangladesh Bureau of Statistics  
55  
56 2008). The prevalence of hypertension was significantly higher in urban than rural participants  
57  
58  
59  
60

1  
2  
3 (23.6% vs. 10.8%;  $p < 0.001$ ). More women than men were hypertensive. At baseline, half (49%)  
4  
5  
6 the total hypertensive patients were aware about their BP status and half of those who were  
7  
8 aware (27.2%) had their BP under control (SBP < 140 and DBP < 90 mm Hg) (Figure 2).  
9

10  
11 At follow up, we were able to reach 245 (85%) hypertensive respondents (Figure 1). Of the 42  
12  
13 lost to follow up included 16 migrated out, 7 refused, 3 died and 16 could not be reached after  
14  
15 repeated attempts due to their day time work schedule. Among those available, 83.3%  
16  
17 reported that they visited health care provider at least once after enrolment into the study  
18  
19 (Figure 3A). Over three quarters of hypertensive patients in Dhaka and a third in Matlab visited  
20  
21 professionally qualified doctors (76.7% vs 36.6%,  $P < 0.000$ ) who included MBBS/MD or higher  
22  
23 qualified practitioners. The rest visited drug sellers who included pharmacy men, village doctors  
24  
25 or owner of small drug outlets with or without any diploma or certificate for medical practice.  
26  
27 This difference in choice of provider visit was significantly different between urban and rural  
28  
29 hypertensive patients. Only about a half of those (52.7%) visited care provider could show their  
30  
31 prescribed medication during the follow-up visit. About 28% of the patients did not receive any  
32  
33 written prescription from their care provider.  
34  
35  
36  
37  
38  
39  
40  
41  
42

43 Overall, beta-blockers were the highest prescribed antihypertensive drugs either as single or in  
44  
45 combination with calcium channel blockers followed by calcium channel blockers and  
46  
47 angiotensin receptor blockers (Figure 3B). Higher use of beta-blockers was noted among those  
48  
49 seen by rural drug sellers. Diuretics were prescribed for only about 1% of the total patients.  
50  
51 About 3% patients received sedative or tranquilizer pills although mostly in addition to  
52  
53 antihypertensive medications.  
54  
55  
56  
57  
58  
59  
60



1  
2  
3 Overall, both mean SBP ( $-3.3 \pm 20.7$  mmHg;  $p < 0.01$ ) and DBP ( $-2.0 \pm 13.0$  mmHg;  $p < 0.02$ ) were  
4 significantly lower at follow up (Figure 4A and 4B). Those who visited professionally qualified  
5 providers had significantly lower SBP ( $-3.9 \pm 22.4$  mmHg  $p < 0.03$ ) and DBP ( $-2.7 \pm 14.1$  mmHg  
6  $p < 0.02$ ) as compared to their baseline measure but those who visited drug sellers had no  
7 significant reduction in BP (Figure 4A and 4B).  
8  
9

10  
11 Overall 50% hypertensive patients achieved BP control goal at follow up compared to 27% at  
12 baseline (Figure 2). About 30% of uncontrolled hypertensives at baseline and 46% of newly  
13 diagnosed hypertensives achieved blood pressure goal at follow up. Only 26% of the  
14 hypertensives who had their BP controlled at baseline failed to maintain that at follow up. On  
15 the other hand 46% of stage 1 and 33% of stage 2 hypertensives achieved blood pressure goal  
16 at follow up (data not shown). BP goal achievement tended to be higher among those treated  
17 by professionally qualified practitioners than drug sellers but the difference did not reach  
18 statistical significance. At follow up, the proportion of hypertensive individuals who achieved BP  
19 goals were double as compared to those at baseline (Figure 2).  
20  
21  
22  
23  
24  
25  
26  
27  
28  
29  
30  
31  
32  
33  
34  
35  
36  
37  
38  
39

## 40 DISCUSSION

### 41 *Principal findings*

42  
43 This study reports the prevalence, population awareness and subsequent control of  
44 hypertension in a general population. We demonstrated that raising awareness and simple  
45 health messages result in high provider visits and reduction in blood pressure in Bangladeshi  
46 hypertensive population. The modest reduction in blood pressure that we observed has great  
47 implications for the hypertension prevalence at population level.<sup>19</sup> To our knowledge this is the  
48  
49  
50  
51  
52  
53  
54  
55  
56  
57  
58  
59  
60

1  
2  
3 first community based longitudinal study in Bangladesh that followed up recently diagnosed  
4  
5  
6 hypertensive patients in day-to-day care settings in rural and urban communities.  
7  
8  
9

10 We found about 88% of hypertensives who were already aware at baseline and 78% of newly  
11  
12 diagnosed cases visited health care provider at least once between baseline and the follow up.  
13  
14 More urban patients than rural visited qualified health care professionals and the blood  
15  
16 pressure reduction was significantly greater in that group. On the contrary, more rural patients  
17  
18 (63.4%) from all economic strata (Figure 3A) visited drug sellers and the difference in blood  
19  
20 pressure between baseline and follow up was not significant. It indicates the scope for training  
21  
22 rural drug seller on simplified hypertension management guidelines for effective utilization of  
23  
24 this important health care provider group in hypertension control in Bangladesh. Accessibility  
25  
26 and cost may have played important role for high drug seller visit in rural area among all  
27  
28 socioeconomic strata and need further exploration. Extensive use of beta-blockers by both  
29  
30 types of providers has been identified and need to be addressed urgently. Development and  
31  
32 implementation of a simplified hypertension management guideline and training of providers  
33  
34 may ameliorate the problem.  
35  
36  
37  
38  
39  
40  
41  
42  
43  
44

#### 45 ***Comparison with other studies***

46  
47 Community-based data on blood pressure levels in open populations are scarce in Bangladesh.  
48  
49 We found higher prevalence of hypertension in urban than rural population. Bangladesh Non-  
50  
51 communicable Diseases (NCD) risk factor survey also showed higher prevalence of hypertension  
52  
53 in urban than rural population (20% vs 16%).<sup>6</sup> The overall prevalence of hypertension in this  
54  
55 study was 17.1% and the age adjusted prevalence was 14.5% which is fairly consistent with a  
56  
57  
58  
59  
60

1  
2  
3 similar studies conducted earlier.<sup>6 7</sup> However, a recent systematic review of hypertension  
4  
5 studies in Bangladesh conducted between 1994 and 2002 reported 13.5% as a pooled estimate  
6  
7 of hypertension prevalence.<sup>20</sup>  
8  
9

10  
11 Our study confirms others observation in similar settings that a high level of unawareness  
12  
13 among hypertensive patients in the community.<sup>21 22</sup> At baseline, we found only less than a half  
14  
15 of the hypertensive patients were aware of their blood pressure status and a half of those who  
16  
17 were aware had their BP under control. Similar pattern of poor detection and control of  
18  
19 hypertension has been reported previously as “the rule of halves” that is half of the  
20  
21 hypertensive patients are aware and only half of those aware are treated and half of treated  
22  
23 have their BP target achieved.<sup>23</sup> This implies that without further awareness raising campaigns  
24  
25 about three quarters of total hypertensive patients in Bangladesh will continue to live with  
26  
27 uncontrolled BP.  
28  
29  
30  
31  
32  
33  
34

35  
36 Our longitudinal observation indicates that better BP control can be achieved through simple  
37  
38 community-based efforts to raise awareness. Similar effect of raising awareness on BP control  
39  
40 has been reported in different settings.<sup>21 24</sup> These findings need a longer-term follow up to  
41  
42 verify the sustainability. We know that multiple behavioral changes are possible and repeated  
43  
44 intervention can be more efficacious to sustain lifestyle modifications and improve blood  
45  
46 pressure control.<sup>25 26</sup> Our findings from onetime intervention indicates the scope of targeted  
47  
48 education with regular monitoring through community health workers may result in healthier  
49  
50 lifestyle and lower blood pressure in developing country context. Strengthening primary  
51  
52 healthcare properly might be another option to address hypertension in resource poor settings.  
53  
54  
55  
56  
57  
58  
59  
60

1  
2  
3 Our present findings do not focus on smoking reduction which is known to increase risk of  
4  
5 acute vascular events such as myocardial infarction and stroke in hypertensive patients.<sup>27</sup>  
6  
7  
8 Impact of high blood pressure is likely to be much higher in men in Bangladesh as 50% of them  
9  
10 are smoker as opposed to less than 2% women. Our recent report showed that 25% of all  
11  
12 deaths in Bangladeshi men aged 25 to 69 years are attributable to smoking.<sup>28</sup> This warrants  
13  
14 necessity for further intensification of anti-smoking campaigns in combination with awareness  
15  
16 raising to promote blood pressure control.  
17  
18  
19

20  
21 We found improper antihypertensive medication prescription by both qualified providers and  
22  
23 drug sellers. Beta-blockers were the single highest prescribed drugs particularly by the drug  
24  
25 sellers in rural area which may have implications for long term prognosis as treatment of  
26  
27 uncomplicated hypertension with beta-blockers has been reported to be associated with  
28  
29 increased risk of stroke without any extra benefit for cardiovascular morbidity and mortality.<sup>29</sup>  
30  
31 Major hypertension management guidelines also do not recommend beta-blockers as initial  
32  
33 treatment for hypertension.<sup>30</sup> A High beta-blocker prescription by rural informal practitioners  
34  
35 was also reported by other investigators in Bangladesh.<sup>31</sup>  
36  
37  
38  
39  
40  
41  
42

### 43 ***Strengths and limitations of the study***

44  
45 The major strength of our study is the population-based follow-up of hypertension control in  
46  
47 daily settings, overcoming the limitations of concurrent evaluation of hypertension control in  
48  
49 cross-sectional studies which allowed for a realistic estimation of effect of a simple campaign in  
50  
51 low-income settings.  
52  
53  
54  
55  
56  
57  
58  
59  
60

1  
2  
3 One of the limitations of our study is that we did not have any control. As the study was  
4  
5 conducted in two densely populated areas, it was not possible to keep some hypertensive  
6  
7 without any advice or provide different information. Since we did not influence care seeking  
8  
9 behavior or use of medication, the effect we observed was due to high level of awareness and  
10  
11 seeking care by the hypertensive patients in the community where 50% were unaware about  
12  
13 their condition. The second issue could be whether the blood pressure reduction could  
14  
15 happen anyway as a result of regression to the mean which we believe unlikely in this study as  
16  
17 we took multiple measurements following standardized procedure for characterizing the  
18  
19 baseline status as well as that at follow up. Our trained workers followed the same  
20  
21 measurement protocol and used the same equipment to ensure high quality measurements.  
22  
23 Also, we did not study the actual rational prescribing and qualifying characteristics of the  
24  
25 involved providers. An earlier study in Bangladesh <sup>31</sup> reported in detail their findings on the  
26  
27 qualifications and level of knowledge among non-professional health care providers. They  
28  
29 found that in Bangladesh the majority of village-level providers are certified by some authority  
30  
31 and have some level of understanding of blood pressure measurement and treatment, although  
32  
33 the later could be improved. This certainly will not be the case in many other rural and urban  
34  
35 low-income settings. In this paper we report the modest blood lowering effect due to  
36  
37 awareness and simple health messages at six month after the baseline but further longitudinal  
38  
39 observation is needed to assess the effect of repeated interventions on long term blood  
40  
41 pressure control which will be reported in due course.  
42  
43  
44  
45  
46  
47  
48  
49  
50  
51  
52

53  
54 Our findings suggests that simple community-based efforts to raise awareness, increase  
55  
56 diagnosing, referral advice as well as access to qualified practitioners may result in better BP  
57  
58  
59  
60

1  
2  
3 control in Bangladesh and similar low income settings. These findings also suggest importance  
4  
5 of developing simplified hypertension management guidelines for Bangladesh and needs for  
6  
7 appropriate training of health care providers on the guidelines for management of  
8  
9 hypertension which are lacking at present.  
10  
11

## 12 13 14 **CONCLUSIONS**

15  
16 The implications of our findings are potentially huge in two ways. The high level of  
17  
18 unawareness is alarming. With an estimated 12 million hypertensive patients in Bangladesh,<sup>6</sup>  
19  
20 these high levels of undiagnosed high blood pressure will have big impact on the total burden  
21  
22 of stroke and ischemic heart diseases, which are already the leading causes of adult mortality  
23  
24 and morbidity in the country.<sup>32 33</sup> Secondly, our findings of awareness, treatment seeking  
25  
26 behavior, and blood pressure reduction in both rural and urban settings in Bangladesh give  
27  
28 cause for optimism which needs longer follow up to verify sustainability. Drug sellers are  
29  
30 significant health care providers particularly in rural settings in Bangladesh. Widening the  
31  
32 scope to utilize them effectively through appropriate training on simplified hypertension  
33  
34 management guideline should be explored.  
35  
36  
37  
38  
39  
40  
41  
42  
43  
44  
45  
46  
47  
48  
49  
50  
51  
52  
53  
54  
55  
56  
57  
58  
59  
60

### What is already known on this topic

- Low awareness is common among hypertensive patients and is associated with uncontrolled blood pressure and its cardiovascular and renal complications.
- Modest reduction in average blood pressure has great implications for hypertension prevalence at population level.

### What this study adds

- Results based on follow-up study in low income settings overcoming some limitations of cross-sectional studies.
- Raising awareness through community screening of BP and referral of hypertensive to health care provider appears to be practically feasible approach to control hypertension in low resource settings.
- Realistic estimation of effect of raising awareness on hypertension control in low-income setting.
- Extensive use beta-blockers in hypertension treatment justify need for the development and implementation of simplified hypertension management guidelines.
- Scope of utilizing drug sellers to control hypertension in rural settings.

**List of abbreviations**

ARB = Angiotensin receptor blockers

BB = Beta- blockers

BMI = Body Mass Index

BP = Blood pressure

CCB = Calcium channel blockers

CCCD = Centre for Control of Chronic Diseases

CKD = Chronic Kidney Diseases

CVD = Cardiovascular Diseases

DBP = Diastolic Blood Pressure

ERC = Ethical Review Committee

HDSS = Health and Demographic Surveillance System

icddr,b = International Centre for Diarrhoeal Disease Research, Bangladesh

SBP = Systolic Blood Pressure



## Acknowledgement

We gratefully acknowledge the study participants and Health and Demographic Surveillance staff at Matlab and Kamalapur sites.

**Contributors** All authors substantially contributed to conception and design, collection of data, or analysis and interpretation of data and critical revision of important intellectual content. DSA conceptualized the study, supervised data collection analysis and wrote the 1<sup>st</sup> draft and all redrafts. MAHC, ATS and SA were involved in data collection analysis, interpretation and revision of all drafts of the manuscript. LWN contributed to critical revising of interpretation and finalizing the manuscript. All authors read and approved the final manuscript. DSA is the guarantor.

**Funding** This project has been funded in part with Federal funds from the National Heart, Lung, and Blood Institute, National Institutes of Health, Department of Health and Human Services, under the Contract No. HHSN26820900032C and icddr,b (International Centre for Diarrhoeal Disease Research, Bangladesh). icddr,b acknowledges with gratitude the commitment of the Centre's donors for their generous support to its research efforts. We gratefully acknowledge the study participants and Health and Demographic Surveillance staff at Matlab and Kamalapur sites.

**Competing Interest** The authors declare that they have no competing interests.

**Ethical Approval** The study was approved by the Ethical Review Committee (ERC) of icddr,b.

**Data sharing statement** Collected data as described in the methodology will be available by emailing DSA (dsalam@icddr.org) which can be shared following icddr,b data policy (<http://www.icddr.org/policies>).

**Open Access** This is an Open Access article distributed in accordance with the Creative Commons Attribution Non Commercial (CC BY-NC 3.0) license, which permits others to distribute, remix, adapt, build upon this work noncommercially, and license their derivative works on different terms, provided the original work is properly cited and the use is non-commercial. See: <http://creativecommons.org/licenses/by-nc/3.0/>.

**REFERENCES:**

1. Kearney PM, Whelton M, Reynolds K, et al. Global burden of hypertension: analysis of worldwide data. *Lancet* 2005;**365**(9455):217-23.
2. Lawes CMM, Hoorn SV, Rodgers A. Global burden of blood-pressure-related disease, 2001. *Lancet* 2008;**371**(9623):1513-18.
3. Qureshi AI, Suri MF, Kirmani JF, et al. Is prehypertension a risk factor for cardiovascular diseases? *Stroke* 2005;**36**(9):1859-63.
4. Hsia J, Margolis KL, Eaton CB, et al. Prehypertension and cardiovascular disease risk in the Women's Health Initiative. *Circulation* 2007;**115**(7):855-60.
5. Crews DC, Plantinga LC, Miller ERI, et al. Prevalence of chronic kidney disease in persons with undiagnosed or prehypertension in the United States. *Hypertension* 2010;**55**(5):1102-9.
6. Bangladesh Society of Medicine. Bangladesh NCD Risk Factor Survey 2010. Dhaka: Director General of Health Services, 2011.
7. Sayeed MA, Banu A, Haq JA, et al. Prevalence of hypertension in Bangladesh: effect of socioeconomic risk factor on difference between rural and urban community. *Bangladesh Med Res Counc Bull* 2002;**28**(1):7-18.
8. Zaman MM, Rouf MA. Prevalence of hypertension in a Bangladeshi adult population. *J Hum Hypertens* 1999;**13**(8):547-9.
9. Zaman MM, Yoshiike N, Rouf MA, et al. Cardiovascular risk factors: distribution and prevalence in a rural population of Bangladesh. *J Cardiovasc Risk* 2001;**8**(2):103-8.
10. Damasceno A, Azevedo A, Silva-Matos C, et al. Hypertension prevalence, awareness, treatment, and control in mozambique: urban/rural gap during epidemiological transition. *Hypertension* 2009;**54**(1):77-83.
11. Devi P, Rao M, Sigamani A, et al. Prevalence, risk factors and awareness of hypertension in India: a systematic review. *J Hum Hypertens* 2012;**27**(5):281-7.
12. Hypertension Study Group. Prevalence, awareness, treatment and control of hypertension among the elderly in Bangladesh and India: a multicentre study. *Bulletin of the World Health Organization* 2001;**79**(6):490-500.
13. Hashmi SK, Afridi MB, Abbas K, et al. Factors associated with adherence to anti-hypertensive treatment in Pakistan. *PLoS One* 2007;**2**(3):e280.
14. Pang W, Li Z, Sun Z, et al. Prevalence of hypertension and associated factors among older rural adults: results from Liaoning Province, China. *Med Princ Pract* 2010;**19**(1):22-7.
15. Ginneken JV, Bairagi R, Francisco AD, et al. Health and demographic surveillance in Matlab: past, present, and future,. Dhaka: International Centre for Diarrhoeal Disease Research, Bangladesh, 1999.
16. icddr. Registration of Health and Demographic Events 2011. Health and Demographic Surveillance System - Matlab. Dhaka: International Centre for Diarrhoeal Disease Research, Bangladesh, 2012.
17. icddr. Kamalapur 2005 - 2007 Census Results. Dhaka: International Centre for Diarrhoeal Disease Research, Bangladesh, 2008.
18. Gibson R. Anthropometric assessment of body size. *Principles of Nutritional Assessment*. Second ed. New York: Oxford University Pres, 2005:245-72.
19. Banegas JR, Rodriguez-Artalejo F, de la Cruz Troca JJ, et al. Blood pressure in Spain: distribution, awareness, control, and benefits of a reduction in average pressure. *Hypertension* 1998;**32**(6):998-1002.
20. Moniruzzaman, Taleb A, Rahman S, et al. Prevalence of hypertension among the Bangladeshi adult population: a meta-analysis. *Regional Health Forum* 2013;**17**(1):15-19.

21. Feng XL, Pang M, Beard J. Health system strengthening and hypertension awareness, treatment and control: data from the China Health and Retirement Longitudinal Study. *Bulletin of the World Health Organization* 2014;**92**(1):29-41.
22. Guessous I, Bochud M, Theler JM, et al. 1999-2009 Trends in prevalence, unawareness, treatment and control of hypertension in Geneva, Switzerland. *PLoS One* 2012;**7**(6):e39877.
23. Smith WC, Lee AJ, Crombie IK, et al. Control of blood pressure in Scotland: the rule of halves. *BMJ* 1990;**300**(6730):981-3.
24. Ambrosio GB, Strasser T, Dowd JE, et al. Effects of interventions on community awareness and treatment of hypertension: results of a WHO study. *Bull World Health Organ* 1988;**66**(1):107-13.
25. Appel LJ, Champagne CM, Harsha DW, et al. Effects of comprehensive lifestyle modification on blood pressure control: main results of the PREMIER clinical trial. *JAMA : the journal of the American Medical Association* 2003;**289**(16):2083-93.
26. Elmer PJ, Obarzanek E, Vollmer WM, et al. Effects of comprehensive lifestyle modification on diet, weight, physical fitness, and blood pressure control: 18-month results of a randomized trial. *Annals of internal medicine* 2006;**144**(7):485-95.
27. Nakamura K, Barzi F, Lam TH, et al. Cigarette smoking, systolic blood pressure, and cardiovascular diseases in the Asia-Pacific region. *Stroke* 2008;**39**(6):1694-702.
28. Alam DS, Jha P, Ramasundarahettige C, et al. Smoking-attributable mortality in Bangladesh: proportional mortality study. *Bull World Health Organ* 2013;**91**(10):757-64.
29. Bangalore S, Parkar S, Messerli FH. How useful are beta-blockers in cardiovascular disease? *Anadolu kardiyoloji dergisi: AKD= the Anatolian journal of cardiology* 2006;**6**(4):358-63.
30. National Clinical Guideline Centre (NCGC). Hypertension: clinical management of primary hypertension in adults (Clinical guideline 127: Update of clinical guidelines 18 and 34). London: National Clinical Guideline Centre, 2011.
31. Parr J, Lindeboom W, Khanam M, et al. Informal allopathic provider knowledge and practice regarding hypertension in urban and rural Bangladesh. *PLoS One* 2012;**7**(10):e48056.
32. Miah AH, Sutradhar SR, Ahmed S, et al. Seasonal variation in types of stroke and its common risk factors. *Mymensingh Med J* 2012;**21**(1):13-20.
33. Uddin SN, Begum F, Malik F, et al. Coronary artery disease in young patients: clinical review and risk factor analysis. *Mymensingh Med J* 2003;**12**(1):3-7.

## TABLE

Table 1: Characteristics of the respondents

|                                                | Total<br>n=1678 | Dhaka<br>n=825 | Matlab<br>n=853 | P Value |
|------------------------------------------------|-----------------|----------------|-----------------|---------|
| <b>Age (years)</b>                             | 43.5 ± 15.1     | 40.7 ± 14.8    | 46.1 ± 15.0     | 0.000   |
| <b>Male</b>                                    | 736 (43.9)      | 352 (42.7)     | 384 (45.0)      | 0.332   |
| <b>Education in year</b>                       | 5.1 ± 4.7       | 6.2 ± 5.1      | 4.0 ± 4.0       | 0.000   |
| <b>Educational category</b>                    |                 |                |                 | 0.000   |
| Illiterate                                     | 582 (34.7)      | 245 (29.7)     | 337 (39.5)      |         |
| Primary (1-5 years)                            | 377 (22.5)      | 145 (17.6)     | 232 (27.2)      |         |
| Secondary (6-10 years)                         | 521 (31.0)      | 282 (34.2)     | 239 (28.0)      |         |
| High educated (>11 years)                      | 198 (11.8)      | 153 (18.5)     | 45 (5.3)        |         |
| <b>Occupation</b>                              |                 |                |                 | 0.000   |
| Manual                                         | 368 (21.9)      | 124 (15.0)     | 244 (28.6)      |         |
| Non-Manual*                                    | 1310 (78.1)     | 701 (85.0)     | 609 (71.4)      |         |
| <b>Income '000 Taka†</b>                       | 15.5 ± 13.5     | 19.5 ± 15.5    | 11.6 ± 9.9      | 0.000   |
| <b>Income Group</b>                            |                 |                |                 | 0.000   |
| Low (<=10000tk)                                | 846 (50.4)      | 256 (31.0)     | 590 (69.2)      |         |
| Middle (10001-30000tk)                         | 710 (42.3)      | 478 (57.9)     | 232 (27.2)      |         |
| High (>=30001)                                 | 122 (7.3)       | 91 (11.0)      | 31 (3.6)        |         |
| <b>Body Mass Index in kg/m<sup>2</sup></b>     | 22.6 ± 7.0      | 24.2 ± 5.1     | 21.0 ± 8.1      | 0.000   |
| <b>BMI Category</b>                            |                 |                |                 | 0.000   |
| Underweight (<18.5 kg/m <sup>2</sup> )         | 341 (20.3)      | 92 (11.2)      | 249 (29.2)      |         |
| Overweight/Obese(>=25 kg/m <sup>2</sup> )      | 424 (25.3)      | 328 (39.8)     | 96 (11.3)       |         |
| <b>Waist Circumference in cm</b>               | 77.4 ± 11.7     | 81.0 ± 12.2    | 73.9 ± 10.1     | 0.000   |
| Abdominal obesity                              | 466 (27.8)      | 317 (38.4)     | 149 (17.5)      | 0.000   |
| <b>Extra Salt Intake (At least once a day)</b> | 1345 (80.4)     | 564 (68.5)     | 781 (91.9)      | 0.000   |
| <b>Tobacco use</b>                             |                 |                |                 |         |
| Smokers                                        | 500 (29.8)      | 234 (28.4)     | 266 (31.2)      | 0.207   |
| Chewing Tobacco                                | 536 (31.9)      | 203 (24.6)     | 333 (39.0)      | 0.000   |
| <b>Systolic BP</b>                             | 113.1 ± 18.7    | 117.3 ± 18.9   | 109.1 ± 17.6    | 0.000   |
| <b>Diastolic BP</b>                            | 71.6 ± 15.7     | 72.5 ± 19.4    | 70.7 ± 10.8     | 0.021   |
| <b>Blood Pressure Category</b>                 |                 |                |                 | 0.000   |
| Normal                                         | 1053 (62.8)     | 423 (51.3)     | 630 (73.9)      |         |
| Pre-hypertension                               | 338 (20.1)      | 207 (25.1)     | 131 (15.4)      |         |
| Hypertension                                   | 287 (17.1)      | 195 (23.6)     | 92(10.8)        |         |

Mean ± SD

Numbers in the parenthesis are percentages.

\*Non-manual category included sedentary workers, professionals (e.g. doctors, teachers, etc.), housewives, retired persons, those unable to work and unemployed.

†Bangladesh currency Taka 80.00 = USD 1.00

‡Abdominal obesity was defined as waist circumference ≥90 cm for males and ≥80 cm for females

‡Extra salt intake was referred to table salt consumption at least once a day other than salt used in cooking or food preparation.

## FIGURE LEGENDS

**Figure 1.** Study enrolment and follow up flow diagram

**Figure 2.** Distribution of awareness and control of blood pressure among hypertensive patients at baseline and at follow up by area of residence in Bangladesh

**Figure 3.** Pattern of health care provider visits and medication use in urban Dhaka and rural Matlab, Bangladesh.

Panel A. Distribution of provider visits by area and economic strata. Panel B. Pattern of medication use by area and provider type.

\*Professionals included MBBS/MD or higher educated health care providers. Drug sellers included pharmacy men, village doctors or owner of small drug outlets with or without any diploma or certificate for medical practice.

BB – Beta- blockers, CCB – Calcium channel blockers, ARB – Angiotensin receptor blockers

**Figure 4.** Change in systolic and diastolic blood pressure between baseline and follow-up by provider type.

\* Professionals included MBBS/MD or higher educated health care providers. Drug sellers included pharmacy men, village doctors or owner of small drug outlets with or without any diploma or certificate for medical practice.

**Title:**

AWARENESS AND CONTROL OF HYPERTENSION IN BANGLADESH – FOLLOW UP OF A  
HYPERTENSIVE COHORT

**Authors:**

Dewan Shamsul ALAM<sup>1\*</sup>, Muhammad Ashique Haider CHOWDHURY<sup>1</sup>, Ali Tanweer SIDDIQUEE<sup>1</sup>,  
Shyfuiddin AHMED<sup>1</sup>, Louis Wilhelmus NIESSEN<sup>2,3</sup>

**Authors affiliations:**

<sup>1</sup>Centre for Control of Chronic Diseases (CCCD), icddr,b, 68 Shaheed Tajuddin Ahmed Sharani,  
Mohakhali, Dhaka 1212, Bangladesh

Dewan Shamsul ALAM  
Acting director  
Muhammad Ashique Haider CHOWDHURY  
[Senior](#) Research Investigator  
Ali Tanweer SIDDIQUEE  
[Senior](#) Research Investigator  
Shyfuiddin AHMED  
Research Investigator

<sup>2</sup>Johns Hopkins Bloomberg School of Public Health, Baltimore, MD 21205, USA

<sup>3</sup>Liverpool School of Tropical Medicine, University of Warwick, Pembroke Place, Liverpool, L3  
5QA, UK

Louis Wilhelmus NIESSEN  
Professor

\*Correspondence to Dewan Shamsul ALAM; Email: dsalam@icddr.org

**ABSTRACT**

**Objectives** To assess the effect of awareness and advice to seek care on BP control among hypertensive patients in Bangladesh.

**Design** Longitudinal study

**Setting** The study was carried out in icddr, surveillance sites at rural Matlab in Chandpur district and semi-urban Kamalapur in Dhaka, Bangladesh

**Participants** Randomly selected men and non-pregnant women aged 20 years or older without any acute illness or history of any vascular events such as stroke or acute myocardial infarction.

**Main outcome measure** Hypertension was defined as systolic BP (SBP)  $\geq 140$  and/or diastolic BP (DBP)  $\geq 90$  mmHg or as self-reported hypertension under medication. We advised to seek care from qualified provider and adopt healthy lifestyle. We compared changes in BP from baseline to follow-up at around 6 month.

**Results** Overall 17.1% (n=287) had hypertension at baseline with significantly higher prevalence in urban than rural population (23.6% vs 10.8% ;  $p < 0.001$ ) and a half of them were unaware. At follow up, 83% (n=204) reported visit to any health care provider. In urban area, higher proportion of patients visited medically qualified practitioners than in rural area (76.7% vs 36.6% ,  $P < 0.000$ ). Both SBP ( $-3.3 \pm 20.7$  mmHg;  $p < 0.01$ ) and DBP ( $-2.0 \pm 13.0$  mmHg;  $p < 0.02$ ) were lower at follow up. Those who visited medically qualified practitioners had significant SBP ( $-3.9 \pm 22.4$  mmHg  $p < 0.03$ ) and DBP ( $-2.7 \pm 14.1$  mmHg  $p < 0.02$ ) reduction. BP reduction did not reach statistical significance among those visited pharmacy man or village doctors. Overall, half of the hypertensive patients achieved BP control goal (BP $<140/90$  mmHg).

**Conclusions** Awareness and simple health messages increase provider visit, reduce blood pressure and improve BP control in hypertensive Bangladeshis. Raising awareness and referral advice to hypertensive patients leads to high provider visits, blood pressure reduction and higher BP target achievement in Bangladesh. Findings need a longer-term follow up is required to verify the sustainability.

**Key Words** – Blood pressure, hypertension, awareness, referral advice, treatment, blood pressure control, Bangladesh

Formatted: Font: Not Bold

Formatted: Font: 12 pt, Not Italic, Font color: Auto

Formatted: Font: Not Bold, Not Italic

**Strengths and limitations of the study**

- Results based on follow-up study in low income settings overcoming some limitations of cross-sectional studies.
- Realistic estimation of effect of raising awareness on hypertension control in low-income setting.
- Blood pressure reduction as a result of regression to the mean is unlikely in this study as we took multiple measurements following standardized procedure for characterizing the baseline status as well as that at follow up.



## BACKGROUND

Hypertension is the most widely prevalent but largely preventable risk factor for cardiovascular diseases (CVD) accounting for half of deaths due to ischemic heart disease and stroke.<sup>1</sup>

Globally, 7.6 million premature deaths annually and 6.0% of the global burden of disease are attributable to hypertension.<sup>2</sup> Elevated blood pressure lower than the standard cut-off for hypertension (SBP 140 /DBP 90 mm Hg) is also associated with increased risk of myocardial infarction, stroke and CVD.<sup>3,4</sup> Hypertension is both a cause and consequence of chronic kidney diseases (CKD). A recent study showed prevalence of chronic kidney disease among 22% of undiagnosed hypertensive and 17% pre-hypertensive subjects in the United States.<sup>5</sup> Therefore, uncontrolled hypertension has huge implications for the disease burden due to CVD and CKD.

Recent report suggest 18% or 12 million 25 years or older adults in Bangladesh suffer from hypertension with higher prevalence in urban than in rural population.<sup>6</sup> Earlier reports also showed that 12-15% of 20 years or older Bangladeshi had hypertension.<sup>7-9</sup> Low awareness is common in populations in low income settings including Bangladesh.<sup>10-12</sup> Research has shown that greater awareness is associated with higher adherence to antihypertensive treatments and BP control.<sup>13</sup> Study in China<sup>14</sup> showed only 30-45% of people with hypertension were aware of their condition and only 8% had achieved target BP goals. However, data are scarce on care seeking behavior and blood pressure target achievement after raising awareness. Despite a huge disease burden attributable to hypertension and very high rate of unawareness, it is largely an unrecognized and under-researched public health problem in Bangladesh.

1  
2  
3  
4  
5  
6  
7  
8  
9 So far, all studies in Bangladesh reported prevalence data on hypertension, either measured  
10 and or self-reported, and awareness, treatment and control from cross-sectional studies which  
11 have inherent limitations and fails to provide information on care seeking behavior and level of  
12 control after being aware. In this paper we report prevalence, awareness and control of  
13 hypertension at baseline and explored the effect of raising awareness coupled with health  
14 messages to visit health care provider on, blood pressure and blood pressure goal achievement  
15 among individuals with hypertension in urban and rural Bangladesh.  
16  
17  
18  
19  
20  
21  
22  
23

## 24 METHODS

### 25 Study design and population

26  
27 The longitudinal study was carried out in rural Matlab in Chandpur district and semi-urban  
28 Kamalapur in Dhaka, Bangladesh. In both the sites, International Centre for Diarrhoeal Disease  
29 Research, Bangladesh (icddr,b) has its Health and Demographic Surveillance System (HDSS) in  
30 place.<sup>15-17</sup> Study population consisted of men and non-pregnant women aged 20 years or older  
31 without any acute illness or history of any vascular events such as stroke or acute myocardial  
32 infarction. We selected participants at random from the HDSS databases. We replaced  
33 randomly selected individuals who were unavailable ([17% in semiurban Kamalapur and 15% in](#)  
34 [rural Matlab](#)) with age and sex matched participants from the same community who were  
35 eligible but were not included in sample. Between February and August 2011, we conducted a  
36 baseline survey and identified individuals with hypertension. [Very few participants declined to](#)  
37 [participate \(3.9% in Kamalapur and none in Matlab\)](#). We informed the blood pressure status  
38 and provided simple health messages to the hypertensive individuals with emphasis on visiting  
39 health care provider, possible complications if untreated, and lifestyle factors. We followed up  
40  
41  
42  
43  
44  
45  
46  
47  
48  
49  
50  
51  
52  
53  
54  
55  
56  
57  
58  
59  
60

these hypertensive patients and measured BP again at 4-6 month after baseline and documented history of provider visits, medication use and blood pressure status. The study was approved by the Ethical Review Committee (ERC) of icddr,b. An informed voluntary written consent was obtained from each participant before enrolment.

### Sample Size

We estimated sample size for each age group to measure prevalence within 10% precision with 80% power. As the prevalence of hypertension increases with age, we assumed the lowest prevalence of 5% in 20-24 years age group and the highest 20% or higher in 65years or older age groups during stratum specific sample size estimation. The estimated total sample size after considering possible refusal or non-participation was 1600 participants (800 in each site).

### Data collection

We collected data on socioeconomic, demographic, lifestyle factors using a structured questionnaire. Trained interviewers administered the questionnaire at participants' home. Interviewers also measured weight, height, waist and hip circumferences following standard procedure<sup>18</sup>. We proscribed all participants of drinking tea, coffee, or carbonated beverages, eating, smoking and avoid heavy physical activity at least 30 minutes prior to blood pressure measurement. We allowed 10 minutes rest before measuring blood pressure three times at five minutes interval on left arm in sitting position with the arm supported at the level of the heart using Omron M10™ digital blood pressure machine. The first BP measurement was discarded to avoid possible anxiety effect, and the mean value of the second and third measurements was considered for both systolic and diastolic BP. SBP  $\geq 140$  mmHg or DBP  $\geq 90$  mmHg or both was

1  
2  
3  
4  
5  
6  
7  
8  
9 defined as hypertension. Participants who were on anti-hypertensive medications and could  
10 show or name antihypertensive medication or produce the prescription, we considered them as  
11 aware and self-reported hypertensive irrespective of their BP status at the time of  
12 measurement. Participants, who had high BP according to above mentioned criteria and were  
13 not under any antihypertensive medication or lifestyle modification advice by any provider,  
14 were considered as unaware.  
15  
16  
17  
18  
19

### 20 21 **Health advices**

22  
23 We informed all hypertensive patients about their blood pressure status and provided them  
24 simple health messages in local language, Bengali. The health messages included information  
25 on risk factors for hypertension, possible risk associated with uncontrolled BP, lifestyle and diet  
26 related issues particularly smoking, physical activity and extra salt intake. We advised them to  
27 visit a qualified health care provider. A written outline was followed to deliver the health  
28 messages uniformly and adequately. However, study workers were not involved in providing  
29 any prescription or medication. Adequate training including periodic refresher training of the  
30 health workers and regular field visit by the supervisors were ensured to minimize intra and  
31 inter individual inconsistency.  
32  
33  
34  
35  
36  
37  
38  
39  
40  
41

### 42 **Follow up**

43  
44 We followed up all available hypertensive patients at around 4-6 month and collected data on  
45 treatment seeking, provider visits, and medication use. A study nurse or trained Health Workers  
46 measured blood pressure using the same electronic blood pressure monitor following the same  
47 procedure as that in baseline. The nurse or the health worker did not have access to blood  
48  
49  
50  
51  
52  
53  
54  
55  
56  
57  
58  
59  
60

pressure data collected earlier and were not aware of the purpose of the study. We considered blood pressure goal is achieved when mean value of second and third measurements of SBP and DBP at follow up was <140 mmHg and <90 mmHg respectively.

#### **Data analysis**

Data were entered on computer with built in range and consistency check using MS Access. Descriptive data are presented as frequency and percentages for the categorical variables, and as mean and standard deviation for the continuous variables. Chi-square test was used to examine the association between categorical variables. Paired t-test was used to compare within individual change in blood pressure from baseline to follow up. A p-value <0.05 was considered statistically significant.

#### **RESULTS**

In total, 1678 participants were interviewed and blood pressure measured in urban Dhaka (n=825) and rural Matlab (n=853) (Figure 1). Characteristics of the study participant are presented in Table 1. On average, participants were 43 years old and 44% were males. Urban participants were younger, more educated, had higher BMI, more abdominal obesity, higher income and of more non-manual occupation than rural participants. However, rural participants used more chewing tobacco and consumed more extra salt.

In total, 287 (17.1%) respondents were finally diagnosed as hypertensive cases ([Table 1](#) [Controlled- 4.6%; Stage 1- 8.2% and Stage 2- 4.3%](#)). Age standardized prevalence of hypertension was 14.8% (Bangladesh standard population as reported by the Bangladesh Bureau of Statistics 2008). The prevalence of hypertension was significantly higher in urban

1  
2  
3  
4  
5  
6  
7  
8  
9 than rural [among](#) participants (23.6% vs. 10.8%;  $p < 0.001$ ). More women than men were  
10 hypertensive. At baseline, half (49%) the total hypertensive patients were aware about their BP  
11 status [but only](#) and half of those who were aware ([5527.2%](#)) had their BP under control  
12 (SBP < 140 and DBP < 90 mm Hg) (Figure 2).

13  
14  
15  
16  
17  
18 At follow up, we were able to reach 245 (85%) hypertensive respondents (Figure 1). Of the 42  
19 lost to follow up included 16 migrated out, 7 refused, 3 died and 16 could not be reached after  
20 repeated attempts due to their day time work schedule. Among those available, 83.3%  
21 reported that they visited health care provider at least once after enrolment into the study  
22 (Figure 3A). Over three quarters of hypertensive patients in Dhaka and a third in Matlab visited  
23 professionally qualified doctors (76.7% vs 36.6%,  $P < 0.000$ ) who included MBBS/MD or higher  
24 qualified practitioners. The rest visited drug sellers who included pharmacy men, village doctors  
25 or owner of small drug outlets with or without any diploma or certificate for medical practice.  
26 This difference in choice of provider visit was significantly different between urban and rural  
27 hypertensive patients. Only about a half of those (52.7%) visited care provider could show their  
28 prescribed medication during the follow-up visit. About 28% of the patients did not receive any  
29 written prescription from their care provider.  
30  
31  
32  
33  
34  
35  
36  
37  
38  
39  
40  
41  
42

43 Overall, beta-blockers were the highest prescribed antihypertensive drugs either as single or in  
44 combination with calcium channel blockers followed by calcium channel blockers and  
45 angiotensin receptor blockers (Figure 3B). Higher use of beta-blockers was noted among those  
46 seen by rural drug sellers. Diuretics were prescribed for only about 1% of the total patients.  
47  
48  
49  
50  
51  
52  
53  
54  
55  
56  
57  
58  
59  
60

About 3% patients received sedative or tranquilizer pills although mostly in addition to antihypertensive medications.

Overall, both mean SBP ( $-3.3 \pm 20.7$  mmHg;  $p < 0.01$ ) and DBP ( $-2.0 \pm 13.0$  mmHg;  $p < 0.02$ ) were significantly lower at follow up (Figure 4A and 4B). Those who visited professionally qualified providers had significantly lower SBP ( $-3.9 \pm 22.4$  mmHg  $p < 0.03$ ) and DBP ( $-2.7 \pm 14.1$  mmHg  $p < 0.02$ ) as compared to their baseline measure but those who visited drug sellers had no significant reduction in BP (Figure 4A and 4B).

Overall 50% hypertensive patients achieved BP control goal at follow up compared to 27% at baseline (Figure 2). About 30% of uncontrolled hypertensives at baseline and 46% of newly diagnosed hypertensives achieved blood pressure goal at follow up. On the other hand Only 26% of the hypertensives who had their BP controlled at baseline failed to maintain that at follow up. On the other hand 46% of stage 1 and 33% of stage 2 hypertensives achieved blood pressure goal at follow up (data not shown). BP goal achievement tended to be higher among those treated by professionally qualified practitioners than drug sellers but the difference did not reach statistical significance. At follow up, the proportion of hypertensive individuals who achieved BP goals were double as compared to those at baseline (Figure 2).

## DISCUSSION

### *Principal findings*

This study reports the prevalence, population awareness and subsequent control of hypertension in a general population. We demonstrated that raising awareness and simple health messages result in high provider visits and reduction in blood pressure in Bangladeshi

hypertensive population. The modest reduction in blood pressure that we observed has great implications for the hypertension prevalence at population level.<sup>19</sup> To our knowledge this is the first community based longitudinal study in Bangladesh that followed up recently diagnosed hypertensive patients in day-to-day care settings in rural and urban communities.

We found about 88% of hypertensives who were already aware at baseline and 78% of newly diagnosed cases visited health care provider at least once between baseline and the follow up.

More urban patients than rural visited qualified health care professionals and the blood pressure reduction was significantly greater in that group. On the contrary, more rural patients

(63.4%) [from all economic strata \(Figure 3A\)](#) visited drug sellers and the difference in blood pressure between baseline and follow up was not significant. It indicates [an urgent necessity the scope](#) for training rural drug seller on simplified hypertension management guidelines for effective utilization of this important health care provider group in hypertension control in Bangladesh. [Accessibility and cost may have played important role for high drug seller visit in rural area among all socioeconomic strata and need further exploration.](#) Extensive use of beta-blockers by both types of providers has been identified [as knowledge gap that and](#) need to be addressed [and updated](#) urgently. [This implies that the d](#) Development and implementation of a simplified hypertension management guideline and training of providers may ameliorate the problem.

#### ***Comparison with other studies***

Community-based data on blood pressure levels in open populations are scarce in Bangladesh.

We found higher prevalence of hypertension in urban than rural population. Bangladesh Non-



communicable Diseases (NCD) risk factor survey also showed higher prevalence of hypertension in urban than rural population (20% vs 16%).<sup>6</sup> The overall prevalence of hypertension in this study was 17.1% and the age adjusted prevalence was 14.5% which is fairly consistent with a similar studies conducted earlier.<sup>6,7</sup> However, a recent systematic review of hypertension studies in Bangladesh conducted between 1994 and 2002 reported 13.5% as a pooled estimate of hypertension prevalence.<sup>20</sup>

Our study confirms others observation in similar settings that a high level of unawareness among hypertensive patients in the community.<sup>21,22</sup> At baseline, we found only less than a half of the hypertensive patients were aware of their blood pressure status and a half of those who were aware had their BP under control. Similar pattern of poor detection and control of hypertension has been reported previously as “the rule of halves” that is half of the hypertensive patients are aware and only half of those aware are treated and half of treated have their BP target achieved.<sup>23</sup> This implies that without further awareness raising campaigns about three quarters of total hypertensive patients in Bangladesh will continue to live with uncontrolled BP.

Our longitudinal observation indicates that better BP control can be achieved through simple community-based efforts to raise awareness. Similar effect of raising awareness on BP control has been reported in different settings.<sup>21,24</sup> These findings need a longer-term follow up to

verify the sustainability. [We know that multiple behavioral changes are possible and repeated intervention can be more efficacious to sustain lifestyle modifications and improve blood pressure control.](#)<sup>25,26</sup> [Our findings from onetime intervention indicates the scope of targeted](#)

[education with regular monitoring through community health workers](#) ~~may result in to improve~~ [healthier lifestyle and lower blood pressure in developing country context. Strengthening primary healthcare properly might be another option to address hypertension in resource poor settings.](#)

Our present findings do not focus on smoking reduction which is known to increase risk of acute vascular events such as myocardial infarction and stroke in hypertensive patients.<sup>27</sup> Impact of high blood pressure is likely to be much higher in men in Bangladesh as 50% of them are smoker as opposed to less than 2% women. Our recent report showed that 25% of all deaths in Bangladeshi men aged 25 to 69 years are attributable to smoking.<sup>28</sup> This warrants necessity for further intensification of anti-smoking campaigns in combination with awareness raising to promote blood pressure control.

We found improper antihypertensive medication prescription by both qualified providers and drug sellers. Beta-blockers were the single highest prescribed drugs particularly by the drug sellers in rural area which may have implications for long term prognosis as treatment of uncomplicated hypertension with beta-blockers has been reported to be associated with increased risk of stroke without any extra benefit for cardiovascular morbidity and mortality.<sup>29</sup>

Major hypertension management guidelines also do not recommend beta-blockers as initial treatment for hypertension.<sup>30</sup> A High beta-blocker prescription by rural informal practitioners was also reported by other investigators in Bangladesh.<sup>31</sup>

### ***Strengths and limitations of the study***

The major strength of our study is the population-based follow-up of hypertension control in daily settings, overcoming the limitations of concurrent evaluation of hypertension control in cross-sectional studies which allowed for a realistic estimation of effect of a simple campaign in low-income settings.

One of the limitations of our study is that we did not have any control. As the study was conducted in two densely populated areas, it was not possible to keep some hypertensive without any advice or provide different information. Since we did not influence care seeking behavior or use of medication, the effect we observed was due to high level of awareness and seeking care by the hypertensive patients in the community where 50% were unaware about their condition. The second issue could be whether the blood pressure reduction could happen anyway as a result of regression to the mean which we believe unlikely in this study as we took multiple measurements following standardized procedure for characterizing the baseline status as well as that at follow up. Our trained workers followed the same measurement protocol and used the same equipment to ensure high quality measurements. Also, we did not study the actual rational prescribing and qualifying characteristics of the involved providers. An earlier study in Bangladesh<sup>31</sup> reported in detail their findings on the qualifications and level of knowledge among non-professional health care providers. They found that in Bangladesh the majority of village-level providers are certified by some authority and have some level of understanding of blood pressure measurement and treatment, although the later could be improved. This certainly will not be the case in many other rural and urban low-income settings. [In this paper we report the modest blood lowering effect due to](#)

awareness and simple health messages at six month after the baseline but further longitudinal observation is needed to assess the effect of repeated interventions on long term blood pressure control which will be reported in due course.

Our findings suggests that simple community-based efforts to raise awareness, increase diagnosing, referral advice as well as access to qualified practitioners may result in better BP control in Bangladesh and similar low income settings. These findings also suggest importance of developing simplified hypertension management guidelines for Bangladesh and needs for appropriate training of health care providers on the guidelines for management of hypertension which are lacking at present.

## CONCLUSIONS

The implications of our findings are potentially huge in two ways. The high level of unawareness is alarming. With an estimated 12 million hypertensive patients in Bangladesh,<sup>6</sup> these high levels of undiagnosed high blood pressure will have big impact on the total burden of stroke and ischemic heart diseases, which are already the leading causes of adult mortality and morbidity in the country.<sup>32 33</sup> Secondly, our findings of ~~raising~~ awareness, treatment seeking behavior, and blood pressure reduction in both rural and urban settings in Bangladesh give cause for optimism which needs longer follow up to verify sustainability. Drug sellers are significant health care providers particularly in rural settings in Bangladesh. who can be effectively utilized Widening the scope to utilize them effectively for hypertension control bythrough appropriate training on eand simplified hypertension management guideline should be explored.

**What is already known on this topic**

- Low awareness is common among hypertensive patients and is associated with uncontrolled blood pressure and its cardiovascular and renal complications.
- Modest reduction in average blood pressure has great implications for hypertension prevalence at population level.

**What this study adds**

- Results based on follow-up study in low income settings overcoming some limitations of cross-sectional studies.
- Raising awareness through community screening of BP and referral of hypertensive to health care provider appears to be practically feasible approach to control hypertension in low resource settings.
- Realistic estimation of effect of raising awareness on hypertension control in low-income setting.
- Extensive use beta-blockers in hypertension treatment justify need for the development and implementation of simplified hypertension management guidelines.
- Scope of utilizing drug sellers to control hypertension in rural settings.

**List of abbreviations**

ARB = Angiotensin receptor blockers

BB = Beta- blockers

BMI = Body Mass Index

BP = Blood pressure

CCB = Calcium channel blockers

CCCD = Centre for Control of Chronic Diseases

CKD = Chronic Kidney Diseases

CVD = Cardiovascular Diseases

DBP = Diastolic Blood Pressure

ERC = Ethical Review Committee

HDSS = Health and Demographic Surveillance System

icddr,b = International Centre for Diarrhoeal Disease Research, Bangladesh

SBP = Systolic Blood Pressure

### Acknowledgement

We gratefully acknowledge the study participants and Health and Demographic Surveillance staff at Matlab and Kamalapur sites.

Formatted: Font: Not Bold

**Contributors** All authors substantially contributed to conception and design, collection of data, or analysis and interpretation of data and critical revision of important intellectual content, Study concept, design & proposal was developed by DSA conceptualized the study, supervised data collection analysis and wrote the 1<sup>st</sup> draft and all redrafts. MAHC, ATS and SA were involved in data collection All authors contributed equally to the analysis, interpretation and drafting of the manuscript. analysis, interpretation and revision of all drafts of the manuscript.

Formatted: Font: Not Bold

Formatted: Font: Not Bold, (Asian) Japanese

Formatted: Superscript

LWN contributed to critical revising of interpretation and finalizing the manuscript. All authors read and approved the final manuscript. DSA is the guarantor.

**Funding** -This project has been funded in part with Federal funds from the National Heart, Lung, and Blood Institute, National Institutes of Health, Department of Health and Human Services, under the Contract No. HHSN26820900032C and icddr,b (International Centre for Diarrhoeal Disease Research, Bangladesh). icddr,b acknowledges with gratitude the commitment of the Centre's donors for their generous support to its research efforts. We gratefully acknowledge the study participants and Health and Demographic Surveillance staff at Matlab and Kamalapur sites.

**Competing Interest** -The authors declare that they have no competing interests.

**Ethical Approval** The study was approved by the Ethical Review Committee (ERC) of icddr,b.

**Data sharing statement** Collected data as described in the methodology will be are available by emailing with DSA (dsalam@icddr.org) which can be shared following icddr,b data policy (<http://www.icddr.org/policies>)~~http://www.icddr.org/who-we-are/data-policies~~. A detail data set of the study will be made available for public use at the end of contract with National Heart, Lung, and Blood Institute, National Institutes of Health, Department of Health and Human Services (<https://www.nhlbi.hhiacc.org>).

1  
2  
3  
4  
5  
6  
7  
8  
9  
10  
11  
12  
13  
14  
15  
16  
17  
18  
19  
20  
21  
22  
23  
24  
25  
26  
27  
28  
29  
30  
31  
32  
33  
34  
35  
36  
37  
38  
39  
40  
41  
42  
43  
44  
45  
46  
47  
48  
49  
50  
51  
52  
53  
54  
55  
56  
57  
58  
59  
60

**Open Access** This is an Open Access article distributed in accordance with the Creative Commons Attribution Non Commercial (CC BY-NC 3.0) license, which permits others to distribute, remix, adapt, build upon this work noncommercially, and license their derivative works on different terms, provided the original work is properly cited and the use is non-commercial. See: <http://creativecommons.org/licenses/by-nc/3.0/>.

For peer review only



**REFERENCES:**

1. Kearney PM, Whelton M, Reynolds K, et al. Global burden of hypertension: analysis of worldwide data. *Lancet* 2005;**365**(9455):217-23.
2. Lawes CMM, Hoorn SV, Rodgers A. Global burden of blood-pressure-related disease, 2001. *Lancet* 2008;**371**(9623):1513-18.
3. Qureshi AI, Suri MF, Kirmani JF, et al. Is prehypertension a risk factor for cardiovascular diseases? *Stroke* 2005;**36**(9):1859-63.
4. Hsia J, Margolis KL, Eaton CB, et al. Prehypertension and cardiovascular disease risk in the Women's Health Initiative. *Circulation* 2007;**115**(7):855-60.
5. Crews DC, Plantinga LC, Miller ERI, et al. Prevalence of chronic kidney disease in persons with undiagnosed or prehypertension in the United States. *Hypertension* 2010;**55**(5):1102-9.
6. Bangladesh Society of Medicine. Bangladesh NCD Risk Factor Survey 2010. Dhaka: Director General of Health Services, 2011.
7. Sayeed MA, Banu A, Haq JA, et al. Prevalence of hypertension in Bangladesh: effect of socioeconomic risk factor on difference between rural and urban community. *Bangladesh Med Res Counc Bull* 2002;**28**(1):7-18.
8. Zaman MM, Rouf MA. Prevalence of hypertension in a Bangladeshi adult population. *J Hum Hypertens* 1999;**13**(8):547-9.
9. Zaman MM, Yoshiike N, Rouf MA, et al. Cardiovascular risk factors: distribution and prevalence in a rural population of Bangladesh. *J Cardiovasc Risk* 2001;**8**(2):103-8.
10. Damasceno A, Azevedo A, Silva-Matos C, et al. Hypertension prevalence, awareness, treatment, and control in mozambique: urban/rural gap during epidemiological transition. *Hypertension* 2009;**54**(1):77-83.
11. Devi P, Rao M, Sigamani A, et al. Prevalence, risk factors and awareness of hypertension in India: a systematic review. *J Hum Hypertens* 2012;**27**(5):281-7.
12. Hypertension Study Group. Prevalence, awareness, treatment and control of hypertension among the elderly in Bangladesh and India: a multicentre study. *Bulletin of the World Health Organization* 2001;**79**(6):490-500.
13. Hashmi SK, Afridi MB, Abbas K, et al. Factors associated with adherence to anti-hypertensive treatment in Pakistan. *PLoS One* 2007;**2**(3):e280.
14. Pang W, Li Z, Sun Z, et al. Prevalence of hypertension and associated factors among older rural adults: results from Liaoning Province, China. *Med Princ Pract* 2010;**19**(1):22-7.
15. Ginneken JV, Bairagi R, Francisco AD, et al. Health and demographic surveillance in Matlab: past, present, and future,. Dhaka: International Centre for Diarrhoeal Disease Research, Bangladesh, 1999.
16. icddr. Registration of Health and Demographic Events 2011. Health and Demographic Surveillance System - Matlab. Dhaka: International Centre for Diarrhoeal Disease Research, Bangladesh, 2012.
17. icddr. Kamalapur 2005 - 2007 Census Results. Dhaka: International Centre for Diarrhoeal Disease Research, Bangladesh, 2008.
18. Gibson R. Anthropometric assessment of body size. *Principles of Nutritional Assessment*. Second ed. New York: Oxford University Pres, 2005:245-72.
19. Banegas JR, Rodriguez-Artalejo F, de la Cruz Troca JJ, et al. Blood pressure in Spain: distribution, awareness, control, and benefits of a reduction in average pressure. *Hypertension* 1998;**32**(6):998-1002.
20. Moniruzzaman, Taleb A, Rahman S, et al. Prevalence of hypertension among the Bangladeshi adult population: a meta-analysis. *Regional Health Forum* 2013;**17**(1):15-19.

21. Feng XL, Pang M, Beard J. Health system strengthening and hypertension awareness, treatment and control: data from the China Health and Retirement Longitudinal Study. *Bulletin of the World Health Organization* 2014;**92**(1):29-41.
22. Guessous I, Bochud M, Theler JM, et al. 1999-2009 Trends in prevalence, unawareness, treatment and control of hypertension in Geneva, Switzerland. *PLoS One* 2012;**7**(6):e39877.
23. Smith WC, Lee AJ, Crombie IK, et al. Control of blood pressure in Scotland: the rule of halves. *BMJ* 1990;**300**(6730):981-3.
24. Ambrosio GB, Strasser T, Dowd JE, et al. Effects of interventions on community awareness and treatment of hypertension: results of a WHO study. *Bull World Health Organ* 1988;**66**(1):107-13.
25. Appel LJ, Champagne CM, Harsha DW, et al. Effects of comprehensive lifestyle modification on blood pressure control: main results of the PREMIER clinical trial. *JAMA : the journal of the American Medical Association* 2003;**289**(16):2083-93.
26. Elmer PJ, Obarzanek E, Vollmer WM, et al. Effects of comprehensive lifestyle modification on diet, weight, physical fitness, and blood pressure control: 18-month results of a randomized trial. *Annals of internal medicine* 2006;**144**(7):485-95.
27. Nakamura K, Barzi F, Lam TH, et al. Cigarette smoking, systolic blood pressure, and cardiovascular diseases in the Asia-Pacific region. *Stroke* 2008;**39**(6):1694-702.
28. Alam DS, Jha P, Ramasundarahettige C, et al. Smoking-attributable mortality in Bangladesh: proportional mortality study. *Bull World Health Organ* 2013;**91**(10):757-64.
29. Bangalore S, Parkar S, Messerli FH. How useful are beta-blockers in cardiovascular disease? *Anadolu kardiyoloji dergisi: AKD= the Anatolian journal of cardiology* 2006;**6**(4):358-63.
30. National Clinical Guideline Centre (NCGC). Hypertension: clinical management of primary hypertension in adults (Clinical guideline 127: Update of clinical guidelines 18 and 34). London: National Clinical Guideline Centre, 2011.
31. Parr J, Lindeboom W, Khanam M, et al. Informal allopathic provider knowledge and practice regarding hypertension in urban and rural Bangladesh. *PLoS One* 2012;**7**(10):e48056.
32. Miah AH, Sutradhar SR, Ahmed S, et al. Seasonal variation in types of stroke and its common risk factors. *Mymensingh Med J* 2012;**21**(1):13-20.
33. Uddin SN, Begum F, Malik F, et al. Coronary artery disease in young patients: clinical review and risk factor analysis. *Mymensingh Med J* 2003;**12**(1):3-7.

## TABLE

Table 1: Characteristics of the respondents

|                                                | Total<br>n=1678 | Dhaka<br>n=825 | Matlab<br>n=853 | P Value |
|------------------------------------------------|-----------------|----------------|-----------------|---------|
| <b>Age (years)</b>                             | 43.5 ± 15.1     | 40.7 ± 14.8    | 46.1 ± 15.0     | 0.000   |
| <b>Male</b>                                    | 736 (43.9)      | 352 (42.7)     | 384 (45.0)      | 0.332   |
| <b>Education in year</b>                       | 5.1 ± 4.7       | 6.2 ± 5.1      | 4.0 ± 4.0       | 0.000   |
| <b>Educational category</b>                    |                 |                |                 | 0.000   |
| Illiterate                                     | 582 (34.7)      | 245 (29.7)     | 337 (39.5)      |         |
| Primary (1-5 years)                            | 377 (22.5)      | 145 (17.6)     | 232 (27.2)      |         |
| Secondary (6-10 years)                         | 521 (31.0)      | 282 (34.2)     | 239 (28.0)      |         |
| High educated (>11 years)                      | 198 (11.8)      | 153 (18.5)     | 45 (5.3)        |         |
| <b>Occupation</b>                              |                 |                |                 | 0.000   |
| Manual                                         | 368 (21.9)      | 124 (15.0)     | 244 (28.6)      |         |
| Non-Manual*                                    | 1310 (78.1)     | 701 (85.0)     | 609 (71.4)      |         |
| <b>Income '000 Taka†</b>                       | 15.5 ± 13.5     | 19.5 ± 15.5    | 11.6 ± 9.9      | 0.000   |
| <b>Income Group</b>                            |                 |                |                 | 0.000   |
| Low (<=10000tk)                                | 846 (50.4)      | 256 (31.0)     | 590 (69.2)      |         |
| Middle (10001-30000tk)                         | 710 (42.3)      | 478 (57.9)     | 232 (27.2)      |         |
| High (>=30001)                                 | 122 (7.3)       | 91 (11.0)      | 31 (3.6)        |         |
| <b>Body Mass Index in kg/m<sup>2</sup></b>     | 22.6 ± 7.0      | 24.2 ± 5.1     | 21.0 ± 8.1      | 0.000   |
| <b>BMI Category</b>                            |                 |                |                 | 0.000   |
| Underweight (<18.5 kg/m <sup>2</sup> )         | 341 (20.3)      | 92 (11.2)      | 249 (29.2)      |         |
| Overweight/Obese(≥25 kg/m <sup>2</sup> )       | 424 (25.3)      | 328 (39.8)     | 96 (11.3)       |         |
| <b>Waist Circumference in cm</b>               | 77.4 ± 11.7     | 81.0 ± 12.2    | 73.9 ± 10.1     | 0.000   |
| Abdominal obesity                              | 466 (27.8)      | 317 (38.4)     | 149 (17.5)      | 0.000   |
| <b>Extra Salt Intake (At least once a day)</b> | 1345 (80.4)     | 564 (68.5)     | 781 (91.9)      | 0.000   |
| <b>Tobacco use</b>                             |                 |                |                 |         |
| Smokers                                        | 500 (29.8)      | 234 (28.4)     | 266 (31.2)      | 0.207   |
| Chewing Tobacco                                | 536 (31.9)      | 203 (24.6)     | 333 (39.0)      | 0.000   |
| <b>Systolic BP</b>                             | 113.1 ± 18.7    | 117.3 ± 18.9   | 109.1 ± 17.6    | 0.000   |
| <b>Diastolic BP</b>                            | 71.6 ± 15.7     | 72.5 ± 19.4    | 70.7 ± 10.8     | 0.021   |
| <b>Blood Pressure Category</b>                 |                 |                |                 | 0.000   |
| Normal                                         | 1053 (62.8)     | 423 (51.3)     | 630 (73.9)      |         |
| Pre-hypertension                               | 338 (20.1)      | 207 (25.1)     | 131 (15.4)      |         |
| Hypertension                                   | 287 (17.1)      | 195 (23.6)     | 92(10.8)        |         |

Mean ± SD

Numbers in the parenthesis are percentages.

\*Non-manual category included sedentary workers, professionals (e.g. doctors, teachers, etc.), housewives, retired persons, those unable to work and unemployed.

†Bangladesh currency Taka 80.00 = USD 1.00

‡Abdominal obesity was defined as waist circumference ≥90 cm for males and ≥80 cm for females

§Extra salt intake was referred to table salt consumption at least once a day other than salt used in cooking or food preparation.

**FIGURE LEGENDS**

**Figure 1.** Study enrolment and follow up flow diagram

**Figure 2.** Distribution of awareness and control of blood pressure among hypertensive patients at baseline and at follow up by [gender-area of residence](#) in Bangladesh

**Figure 3.** -Pattern of health care provider visits and medication use in urban Dhaka and rural Matlab, Bangladesh.

Panel A. Distribution of provider visits by area [and economic strata](#). Panel B. Pattern of medication use by [hypertensive patients-area and provider type](#).

\*Professionals included MBBS/MD or higher educated health care providers. Drug sellers included pharmacy men, village doctors or owner of small drug outlets with or without any diploma or certificate for medical practice.

BB – Beta- blockers, CCB – Calcium channel blockers, ARB – Angiotensin receptor blockers

**Figure 4.** Change in systolic and diastolic blood pressure between baseline and follow-up by provider type.

\* Professionals included MBBS/MD or higher educated health care providers. Drug sellers included pharmacy men, village doctors or owner of small drug outlets with or without any diploma or certificate for medical practice.

Figure 1.

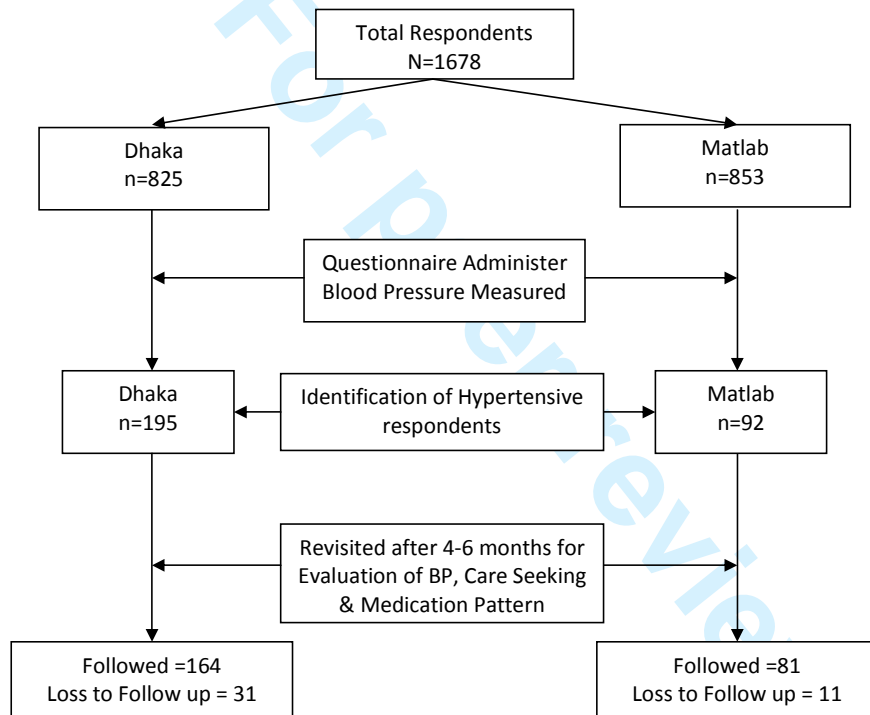

Figure 2.

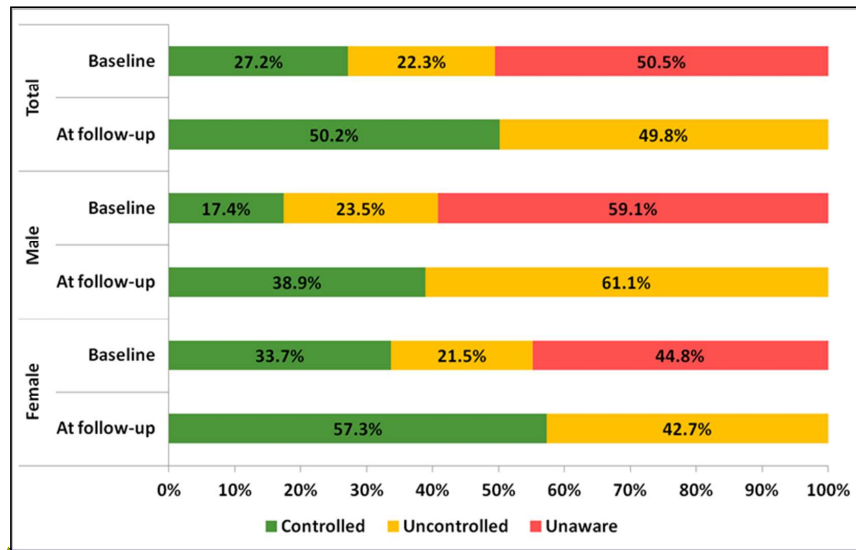

Formatted: Font: 12 pt, Font color: Custom Color(RGB(31,73,125))

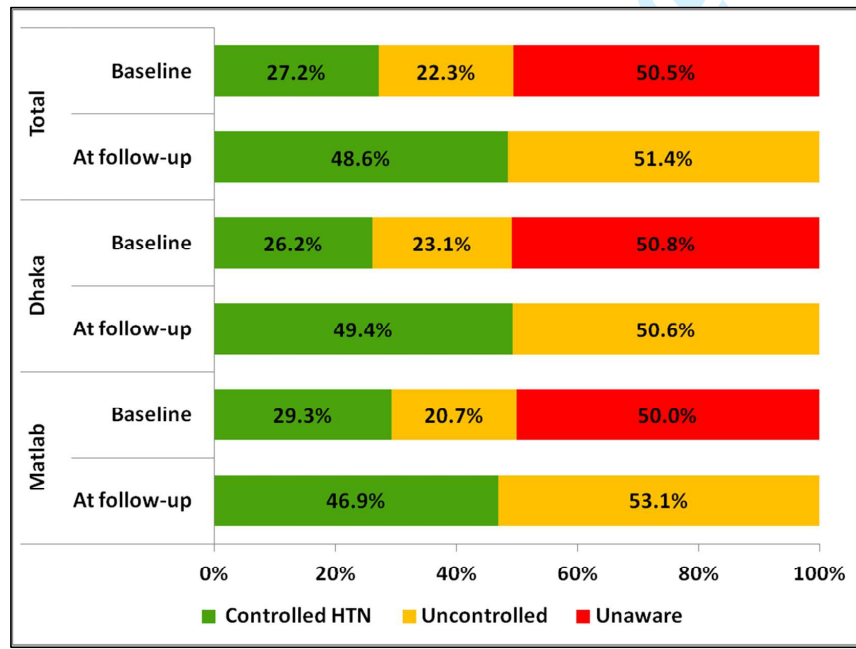

Formatted: Font: 12 pt, Bold

Figure 3.

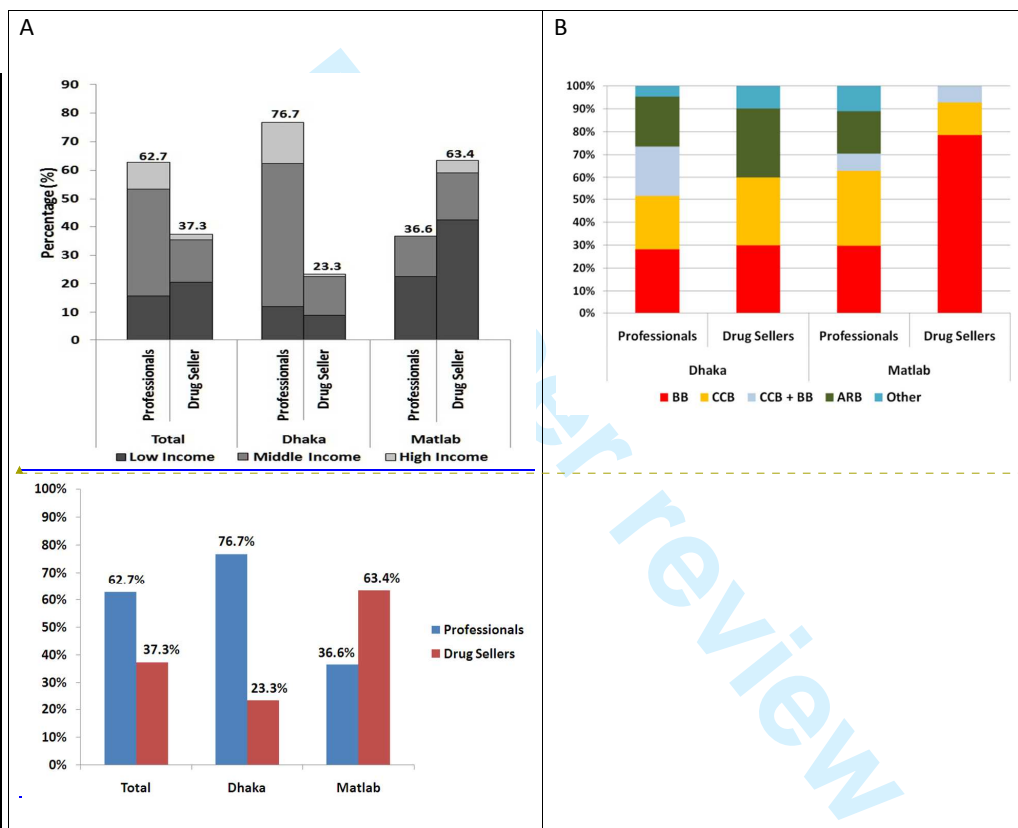

Formatted: Font: 12 pt

Figure 4.

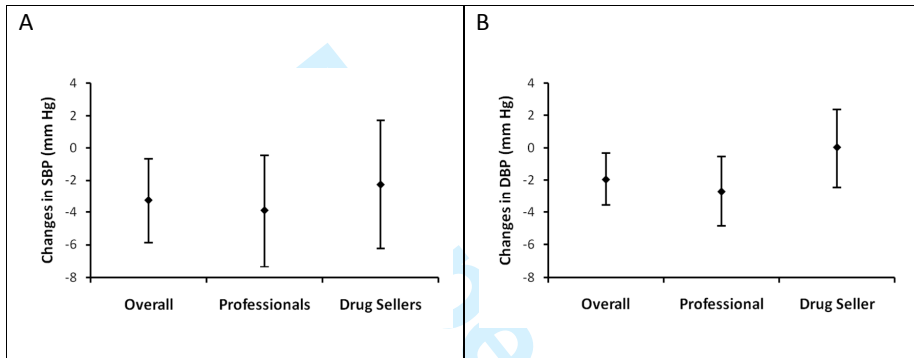



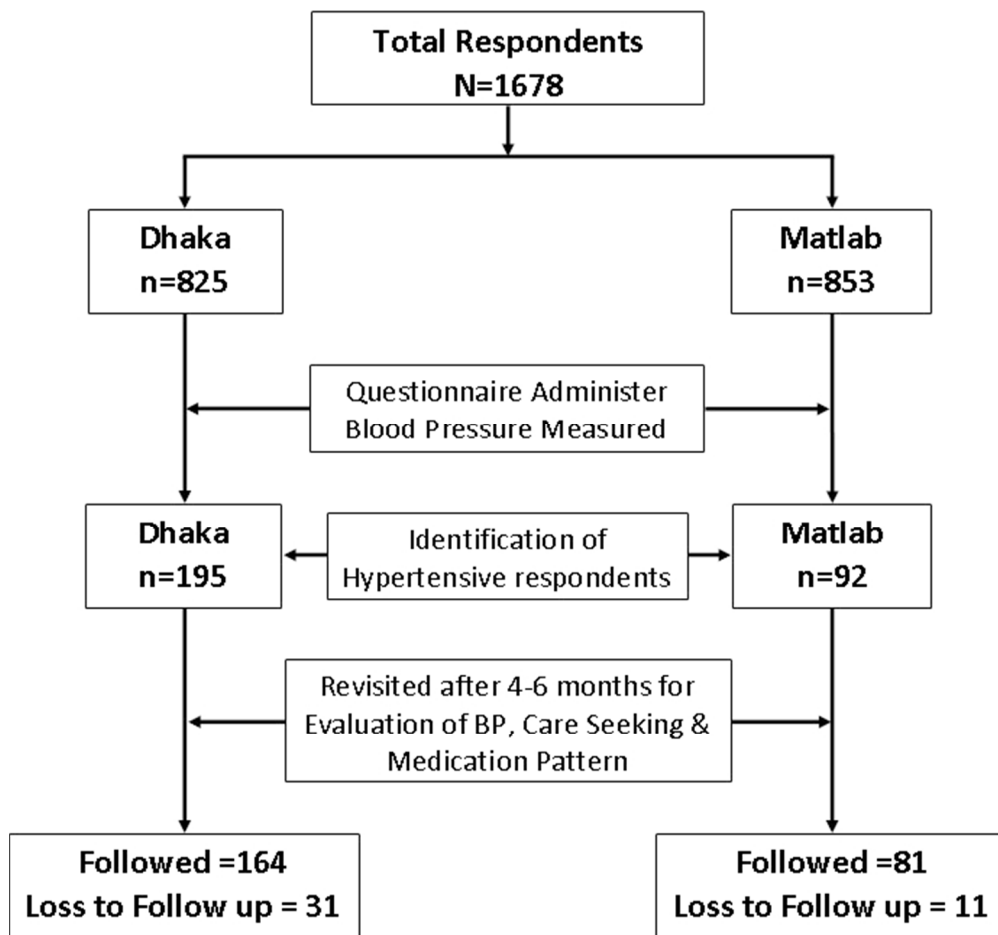

Study enrolment and follow up flow diagram  
58x54mm (300 x 300 DPI)

only

1  
2  
3  
4  
5  
6  
7  
8  
9  
10  
11  
12  
13  
14  
15  
16  
17  
18  
19  
20  
21  
22  
23  
24  
25  
26  
27  
28  
29  
30  
31  
32  
33  
34  
35  
36  
37  
38  
39  
40  
41  
42  
43  
44  
45  
46  
47  
48  
49  
50  
51  
52  
53  
54  
55  
56  
57  
58  
59  
60

1  
2  
3  
4  
5  
6  
7  
8  
9  
10  
11  
12  
13  
14  
15  
16  
17  
18  
19  
20  
21  
22  
23  
24  
25  
26  
27  
28  
29  
30  
31  
32  
33  
34  
35  
36  
37  
38  
39  
40  
41  
42  
43  
44  
45  
46  
47  
48  
49  
50  
51  
52  
53  
54  
55  
56  
57  
58  
59  
60

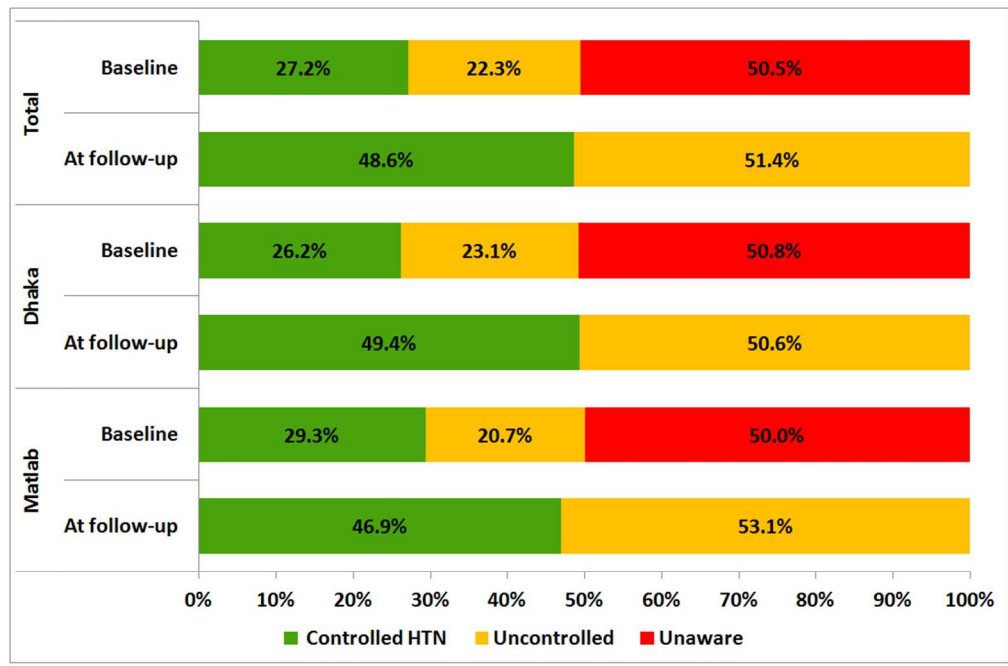

Distribution of awareness and control of blood pressure among hypertensive patients at baseline and at follow up by area of residence in Bangladesh  
92x60mm (300 x 300 DPI)

view only

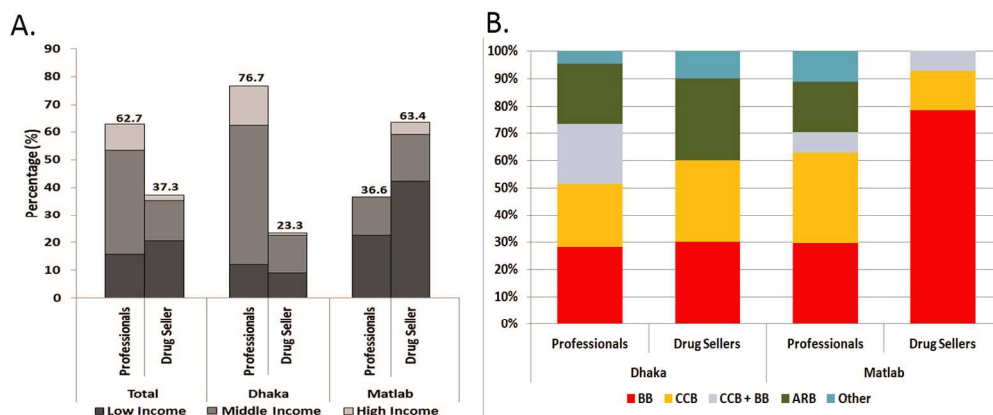

Pattern of health care provider visits and medication use in urban Dhaka and rural Matlab, Bangladesh. Panel A. Distribution of provider visits by area and economic strata. Panel B. Pattern of medication use by hypertensive patients.

\*Professionals included MBBS/MD or higher educated health care providers. Drug sellers included pharmacy men, village doctors or owner of small drug outlets with or without any diploma or certificate for medical practice.

BB – Beta- blockers, CCB – Calcium channel blockers, ARB – Angiotensin receptor blockers  
132x55mm (300 x 300 DPI)

review only

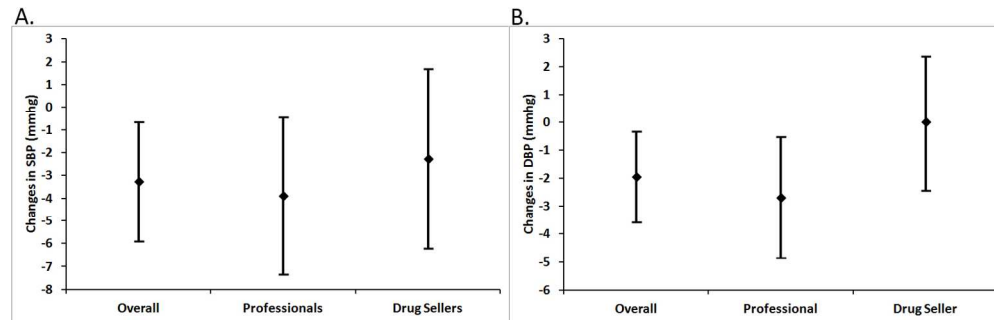

Change in systolic and diastolic blood pressure between baseline and follow-up by provider type.

\* Professionals included MBBS/MD or higher educated health care providers. Drug sellers included pharmacy men, village doctors or owner of small drug outlets with or without any diploma or certificate for medical practice.

142x44mm (300 x 300 DPI)

## STROBE Statement—checklist of items that should be included in reports of observational studies

|                              | Item No | Page No. | Recommendation                                                                                                                                                                                                                                                                                                                                                                                                                                                                                                                                                                                                                                                                                   |
|------------------------------|---------|----------|--------------------------------------------------------------------------------------------------------------------------------------------------------------------------------------------------------------------------------------------------------------------------------------------------------------------------------------------------------------------------------------------------------------------------------------------------------------------------------------------------------------------------------------------------------------------------------------------------------------------------------------------------------------------------------------------------|
| <b>Title and abstract</b>    | √1      | 1, 2     | (a) Indicate the study's design with a commonly used term in the title or the abstract<br>(b) Provide in the abstract an informative and balanced summary of what was done and what was found                                                                                                                                                                                                                                                                                                                                                                                                                                                                                                    |
| <b>Introduction</b>          |         |          |                                                                                                                                                                                                                                                                                                                                                                                                                                                                                                                                                                                                                                                                                                  |
| Background/<br>rationale     | √2      | 4        | Explain the scientific background and rationale for the investigation being reported                                                                                                                                                                                                                                                                                                                                                                                                                                                                                                                                                                                                             |
| Objectives                   | √3      | 5        | State specific objectives, including any prespecified hypotheses                                                                                                                                                                                                                                                                                                                                                                                                                                                                                                                                                                                                                                 |
| <b>Methods</b>               |         |          |                                                                                                                                                                                                                                                                                                                                                                                                                                                                                                                                                                                                                                                                                                  |
| Study design                 | √4      | 5        | Present key elements of study design early in the paper                                                                                                                                                                                                                                                                                                                                                                                                                                                                                                                                                                                                                                          |
| Setting                      | √5      | 5        | Describe the setting, locations, and relevant dates, including periods of recruitment, exposure, follow-up, and data collection                                                                                                                                                                                                                                                                                                                                                                                                                                                                                                                                                                  |
| Participants                 | √6      | 5        | (a) <i>Cohort study</i> —Give the eligibility criteria, and the sources and methods of selection of participants. Describe methods of follow-up<br><i>Case-control study</i> —Give the eligibility criteria, and the sources and methods of case ascertainment and control selection. Give the rationale for the choice of cases and controls<br><i>Cross-sectional study</i> —Give the eligibility criteria, and the sources and methods of selection of participants<br>(b) <i>Cohort study</i> —For matched studies, give matching criteria and number of exposed and unexposed<br><i>Case-control study</i> —For matched studies, give matching criteria and the number of controls per case |
| Variables                    | √7      | 6        | Clearly define all outcomes, exposures, predictors, potential confounders, and effect modifiers. Give diagnostic criteria, if applicable                                                                                                                                                                                                                                                                                                                                                                                                                                                                                                                                                         |
| Data sources/<br>measurement | √8*     | 6        | For each variable of interest, give sources of data and details of methods of assessment (measurement). Describe comparability of assessment methods if there is more than one group                                                                                                                                                                                                                                                                                                                                                                                                                                                                                                             |
| Bias                         | √9      | 5, 6,7   | Describe any efforts to address potential sources of bias                                                                                                                                                                                                                                                                                                                                                                                                                                                                                                                                                                                                                                        |
| Study size                   | √10     | 6        | Explain how the study size was arrived at                                                                                                                                                                                                                                                                                                                                                                                                                                                                                                                                                                                                                                                        |
| Quantitative<br>variables    | √11     | 8        | Explain how quantitative variables were handled in the analyses. If applicable, describe which groupings were chosen and why                                                                                                                                                                                                                                                                                                                                                                                                                                                                                                                                                                     |
| Statistical methods          | √12     | 8        | (a) Describe all statistical methods, including those used to control for confounding<br>(b) Describe any methods used to examine subgroups and interactions<br>(c) Explain how missing data were addressed<br>(d) <i>Cohort study</i> —If applicable, explain how loss to follow-up was addressed<br><i>Case-control study</i> —If applicable, explain how matching of cases and controls was addressed<br><i>Cross-sectional study</i> —If applicable, describe analytical methods taking account of sampling strategy<br>(e) Describe any sensitivity analyses                                                                                                                                |

Continued on next page

| <b>Results</b>           |      |       |                                                                                                                                                                                                              |
|--------------------------|------|-------|--------------------------------------------------------------------------------------------------------------------------------------------------------------------------------------------------------------|
| Participants             | √13* | 8     | (a) Report numbers of individuals at each stage of study—eg numbers potentially eligible, examined for eligibility, confirmed eligible, included in the study, completing follow-up, and analysed            |
|                          |      | 9     | (b) Give reasons for non-participation at each stage                                                                                                                                                         |
|                          |      | 24    | (c) Consider use of a flow diagram                                                                                                                                                                           |
| Descriptive data         | √14* | 8     | (a) Give characteristics of study participants (eg demographic, clinical, social) and information on exposures and potential confounders                                                                     |
|                          |      | 9     | (b) Indicate number of participants with missing data for each variable of interest                                                                                                                          |
|                          |      |       | (c) <i>Cohort study</i> —Summarise follow-up time (eg, average and total amount)                                                                                                                             |
| Outcome data             | √15* | 8, 10 | <i>Cohort study</i> —Report numbers of outcome events or summary measures over time                                                                                                                          |
|                          |      |       | <i>Case-control study</i> —Report numbers in each exposure category, or summary measures of exposure                                                                                                         |
|                          |      |       | <i>Cross-sectional study</i> —Report numbers of outcome events or summary measures                                                                                                                           |
| Main results             | √16  | 8     | (a) Give unadjusted estimates and, if applicable, confounder-adjusted estimates and their precision (eg, 95% confidence interval). Make clear which confounders were adjusted for and why they were included |
|                          |      | 8     | (b) Report category boundaries when continuous variables were categorized                                                                                                                                    |
|                          |      |       | (c) If relevant, consider translating estimates of relative risk into absolute risk for a meaningful time period                                                                                             |
| Other analyses           | 17   |       | Report other analyses done—eg analyses of subgroups and interactions, and sensitivity analyses                                                                                                               |
| <b>Discussion</b>        |      |       |                                                                                                                                                                                                              |
| Key results              | √18  | 10    | Summarise key results with reference to study objectives                                                                                                                                                     |
| Limitations              | √19  | 13    | Discuss limitations of the study, taking into account sources of potential bias or imprecision. Discuss both direction and magnitude of any potential bias                                                   |
| Interpretation           | √20  | 11    | Give a cautious overall interpretation of results considering objectives, limitations, multiplicity of analyses, results from similar studies, and other relevant evidence                                   |
| Generalisability         | √21  | 14    | Discuss the generalisability (external validity) of the study results                                                                                                                                        |
| <b>Other information</b> |      |       |                                                                                                                                                                                                              |
| Funding                  | √22  | 18    | Give the source of funding and the role of the funders for the present study and, if applicable, for the original study on which the present article is based                                                |

\*Give information separately for cases and controls in case-control studies and, if applicable, for exposed and unexposed groups in cohort and cross-sectional studies.

**Note:** An Explanation and Elaboration article discusses each checklist item and gives methodological background and published examples of transparent reporting. The STROBE checklist is best used in conjunction with this article (freely available on the Web sites of PLoS Medicine at <http://www.plosmedicine.org/>, Annals of Internal Medicine at <http://www.annals.org/>, and Epidemiology at <http://www.epidem.com/>). Information on the STROBE Initiative is available at [www.strobe-statement.org](http://www.strobe-statement.org).
